# Supplementary material for: Patient experiences with hypertrophic cardiomyopathy: a conceptual model of symptoms and impacts on quality of life
Source: Springer Nature journal article supplement (doi:10.1186/s41687-020-00269-8), 2020-12-01

# Survey Results and Analysis for Patient Journey Questionnaire 2015 – HCMA and MyoKardia

January 22, 2016

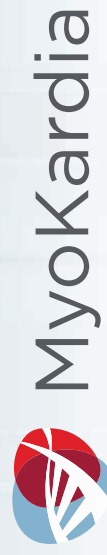

MyoKardia | CONFIDENTIAL

## Survey background

- Collaboration between Lisa Salberg (HCMA) and MyoKardia
- 80 question, web-based survey, exploring HCM patient journey, developed by Lisa Salberg and MyoKardia
- Fielded between August 18 and October 22 of 2015
- The survey was sent online to HCMA members who had completed previous surveys in the past 2 years.
  - 3089 invited
  - 2469 successfully delivered
  - 71 bounces
  - 633 clicks
  - 474 completed
  - 444 completed and answered "yes" to question 1 \*

\* Question 1: "Do you have hypertrophic cardiomyopathy (HCM)? Please note that this includes those who are genetically positive or have a diagnosis either with or without symptoms. Parents may complete on behalf of children under 18 with HCM. If you have lost a loved one to HCM - please answer "no" on this survey and do not answer on their behalf."

## Q2 At what age were you first diagnosed with HCM?

| Response          | Count | Percent |
|-------------------|-------|---------|
| Under 12 months   | 6     | 1.4%    |
| 1 - 5 years       | 7     | 1.6%    |
| 6-12 years        | 17    | 3.8%    |
| 13-25 years       | 42    | 9.5%    |
| 26-40 years       | 111   | 25.0%   |
| 41-55 years       | 174   | 39.2%   |
| 56-70 years       | 80    | 18.0%   |
| 71 years or older | 7     | 1.6%    |
| Total             | 444   |         |

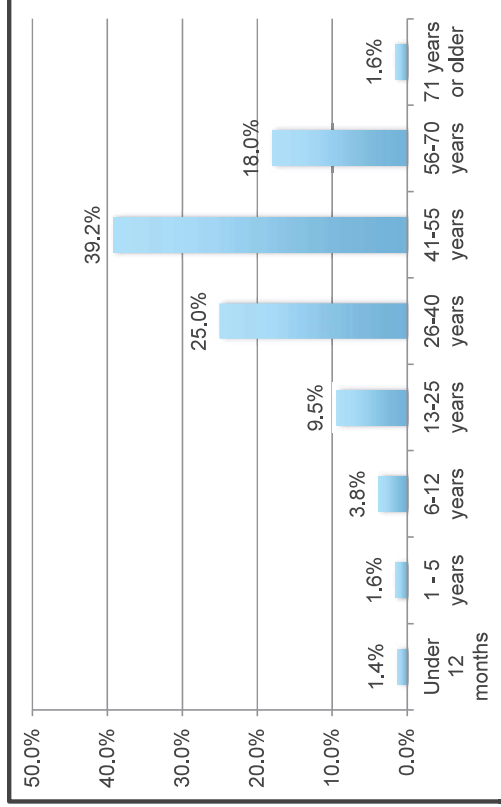

### Q3 What was the reason for your diagnosis?

| Response                                                                                                       | Count      | Percent |
|----------------------------------------------------------------------------------------------------------------|------------|---------|
| My symptoms raised a concern                                                                                   | 206        | 47.1%   |
| No symptoms. Found at general physical - either from a heart murmur-- abnormal ECG or conversation with doctor | 116        | 26.5%   |
| Found at family screening due to a relative's diagnosis of HCM                                                 | 61         | 14.0%   |
| Other                                                                                                          | 48         | 11.0%   |
| Found during athletic screening                                                                                | 6          | 1.4%    |
| <b>Total</b>                                                                                                   | <b>437</b> |         |

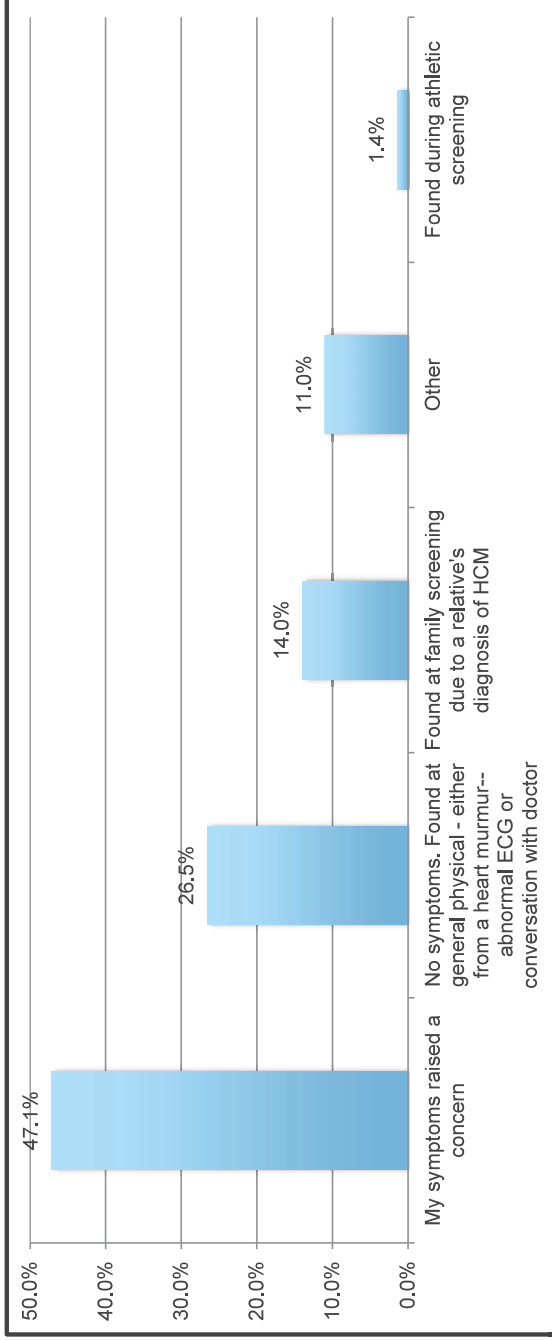



**Q3A1 NEW: Redefine categories**  
**What was the reason for your diagnosis?**

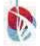

| Response                        | Count | Percent |
|---------------------------------|-------|---------|
| Symptoms                        | 206   | 46.4%   |
| Unrelated medical investigation | 122   | 27.5%   |
| Screening                       | 61    | 13.7%   |
| Other                           | 55    | 12.4%   |
| Total                           | 444   |         |

**Q3A2 NEW: Reclassify "Other" into existing categories**  
**What was the reason for your diagnosis?**

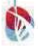

| Response                        | Count | Percent |
|---------------------------------|-------|---------|
| Symptoms                        | 239   | 53.8%   |
| Unrelated medical investigation | 138   | 31.1%   |
| Screening                       | 67    | 15.1%   |
| Total                           | 444   |         |

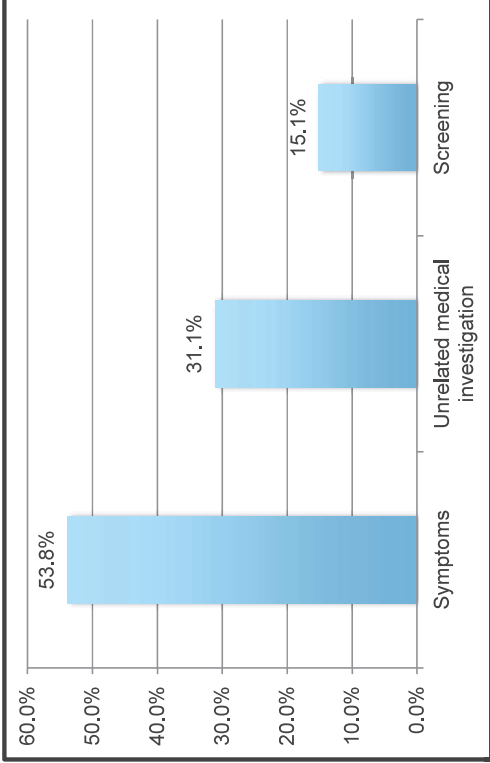

**Q4 Prior to your diagnosis of HCM-- were you diagnosed with any of the following conditions? (Check all that apply)**

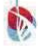

| Response                   | Count | Percent |
|----------------------------|-------|---------|
| Innocent murmur            | 192   | 43.2%   |
| Anxiety or panic attacks   | 71    | 16.0%   |
| Mitral valve prolapse      | 67    | 15.1%   |
| Depression                 | 67    | 15.1%   |
| Asthma                     | 66    | 14.9%   |
| Other                      | 55    | 12.4%   |
| Total (N): all respondents | 444   |         |

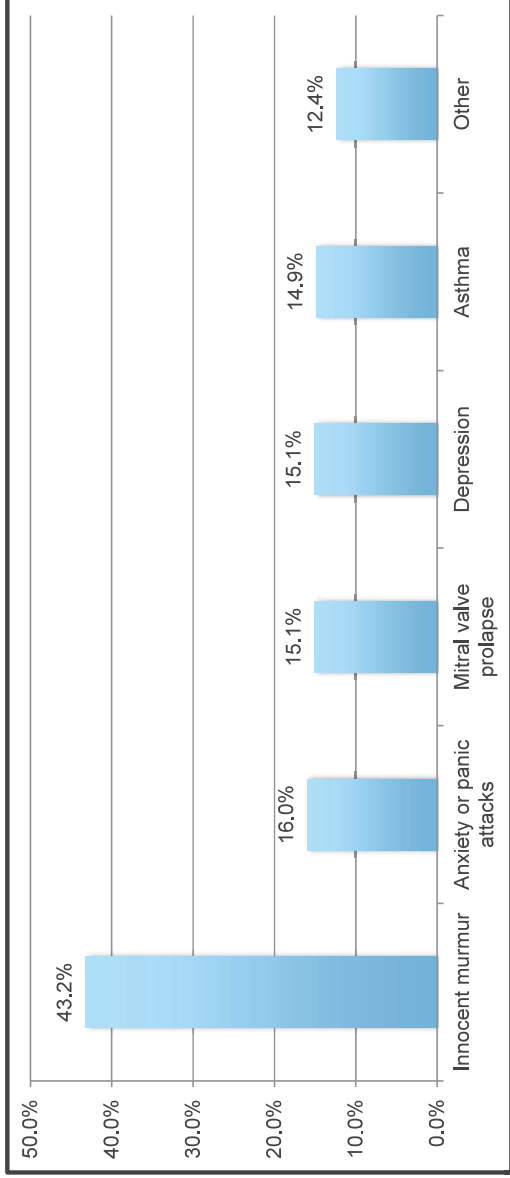

### Q5 Who first diagnosed you with HCM? (Please select one)



| Response                         | Count | Percent |
|----------------------------------|-------|---------|
| General cardiologist             | 317   | 72.5%   |
| Cardiologist specializing in HCM | 61    | 14.0%   |
| Primary care physician           | 42    | 9.6%    |
| Other                            | 17    | 3.9%    |
| Total                            | 437   |         |

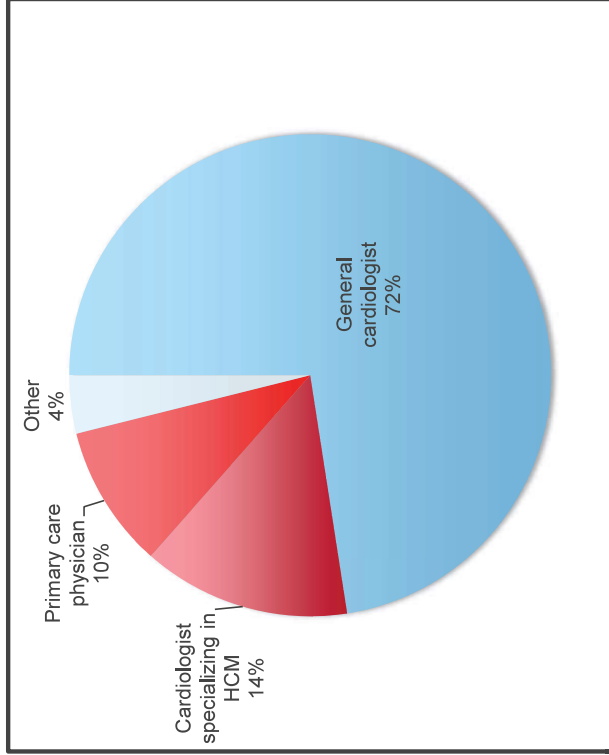

## Q6 Do you have obstructive HCM (have you been diagnosed with left ventricular outflow tract obstruction)?

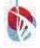

| Response   | Count | Percent |
|------------|-------|---------|
| Yes        | 256   | 58.0%   |
| No         | 146   | 33.1%   |
| Don't know | 39    | 8.8%    |
| Total      | 441   |         |

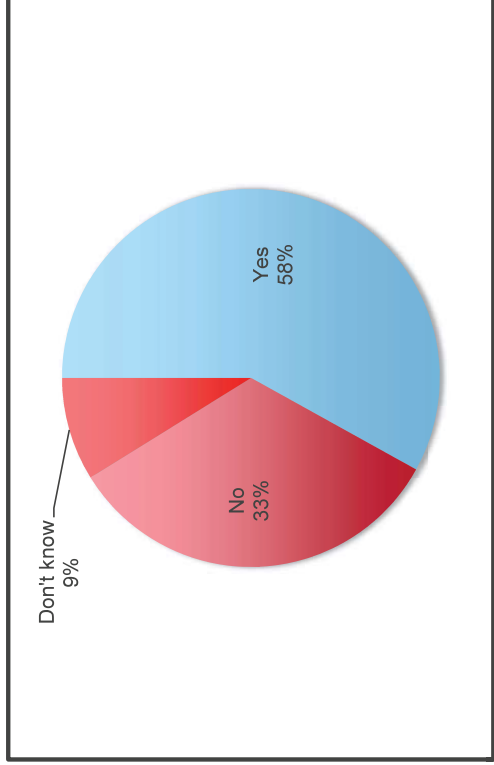

## Q7 Have you been tested for a genetic mutation related to HCM?

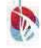

| Response | Count | Percent |
|----------|-------|---------|
| Yes      | 247   | 55.9%   |
| No       | 195   | 44.1%   |
| Total    | 442   |         |

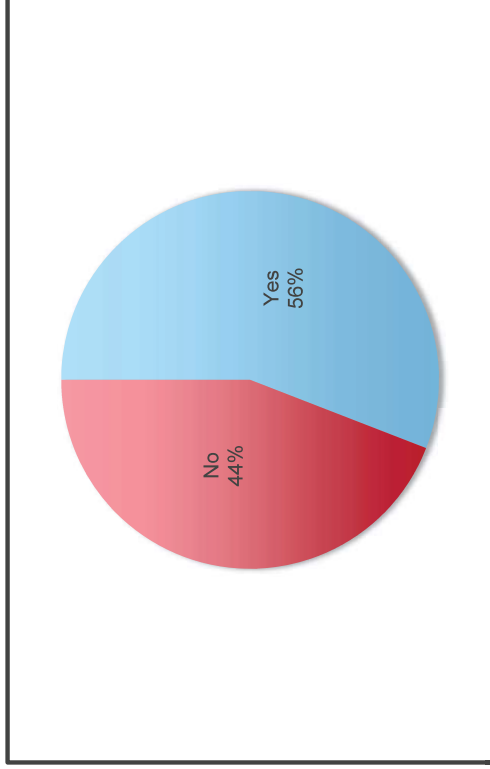

### Q8 If yes-- do you know which mutation was identified?

| Response                                       | Count      | Percent |
|------------------------------------------------|------------|---------|
| Mutation was not identified                    | 78         | 34.5%   |
| Don't know it                                  | 57         | 25.2%   |
| MYBPC3 (Cardiac myosin-binding protein c)      | 33         | 14.6%   |
| MYH7 (β-cardiac myosin heavy chain)            | 25         | 11.1%   |
| TNNT2 (Cardiac troponin T)                     | 7          | 3.1%    |
| TNNT3 (Cardiac troponin I)                     | 6          | 2.7%    |
| TPM1 (α-Tropomyosin)                           | 2          | 0.9%    |
| ACTC (Cardiac actin)                           | 0          | 0.0%    |
| MYL2 (Cardiac myosin regulatory light chain)   | 0          | 0.0%    |
| MYL3 (Cardiac myosin regulatory light chain 3) | 4          | 1.8%    |
| Other                                          | 14         | 6.2%    |
| <b>Total</b>                                   | <b>226</b> |         |

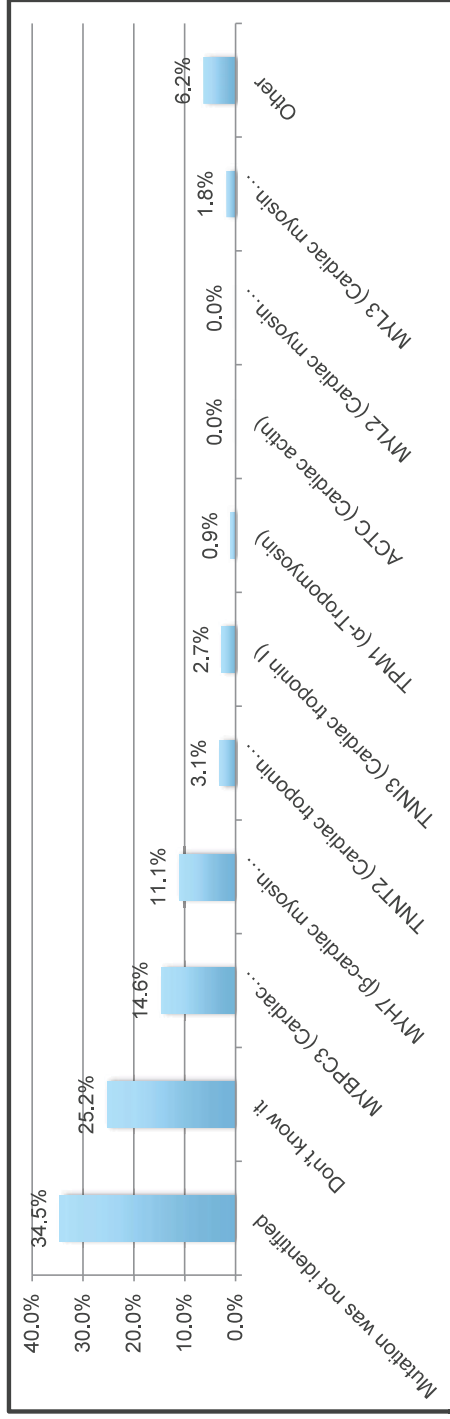

**Q9 If you have not had a genetic test for HCM-- what were the reasons? (Check all that apply)**

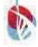

| Response                                                      | Count      | Percent |
|---------------------------------------------------------------|------------|---------|
| Not offered as an option-- or not discussed with my physician | 76         | 39.0%   |
| Cost is too great                                             | 53         | 27.2%   |
| Benefit of genetic test is not clear                          | 44         | 22.6%   |
| Not reimbursed by my insurance                                | 40         | 20.5%   |
| Other                                                         | 39         | 20.0%   |
| Concern about stigma of HCM                                   | 10         | 5.1%    |
| My physician recommended against it                           | 3          | 1.5%    |
| <b>Total (N): those who answered "no" to genetic testing</b>  | <b>195</b> |         |

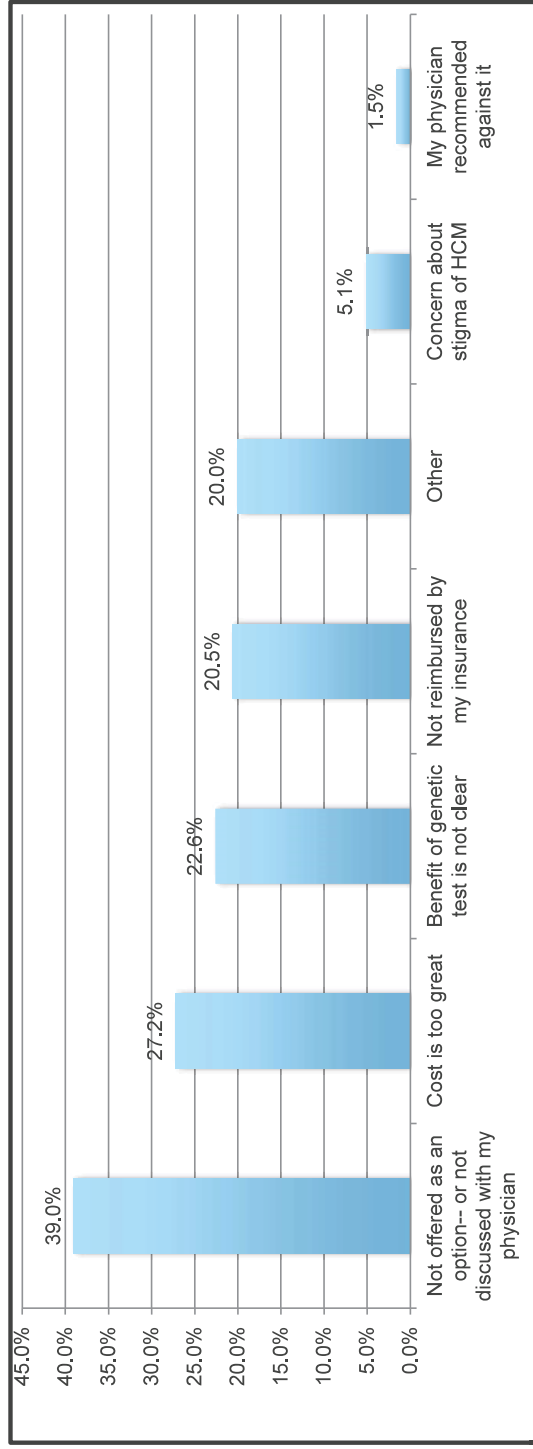



## Q10 Have you received an MRI (imaging test) for your HCM?

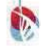

| Response                                         | Count | Percent |
|--------------------------------------------------|-------|---------|
| Yes-- only at diagnosis                          | 145   | 33.0%   |
| Yes-- only during routine follow-ups             | 68    | 15.5%   |
| Yes-- at diagnosis and during routine follow-ups | 83    | 18.9%   |
| No                                               | 144   | 32.7%   |
| Total                                            | 440   |         |

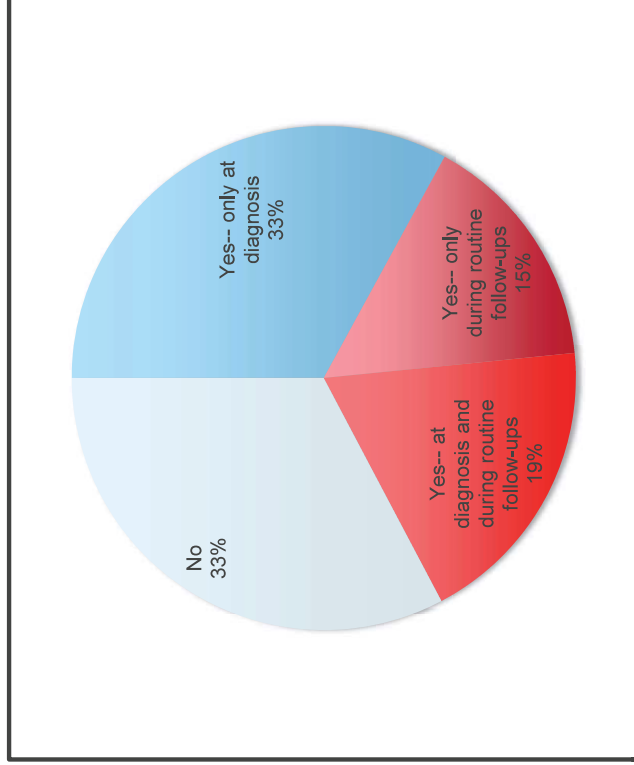

**Q11 Have you undergone exercise testing (walked on a treadmill or stationary bike then gotten an echocardiogram) for your HCM?**



| Response                                                                                              | Count      | Percent |
|-------------------------------------------------------------------------------------------------------|------------|---------|
| Yes-- only at diagnosis                                                                               | 105        | 23.9%   |
| Yes-- only during routine follow-ups                                                                  | 96         | 21.9%   |
| Yes-- at diagnosis and during routine follow-ups                                                      | 201        | 45.8%   |
| No-- I have not had this test-- nor was it discussed                                                  | 26         | 5.9%    |
| No-- I have not had this test-- but was told due to my obstruction and gradient it was not necessary. | 11         | 2.5%    |
| <b>Total</b>                                                                                          | <b>439</b> |         |

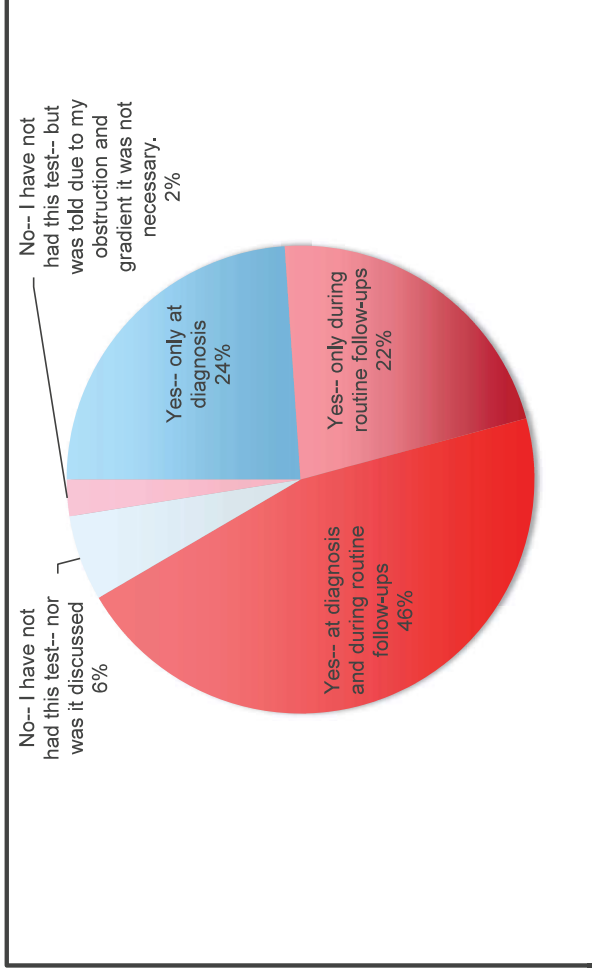

**Q12 Have you ever been diagnosed with any of the following? (Check all that apply)**

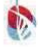

| Response                   | Count | Percent |
|----------------------------|-------|---------|
| Atrial fibrillation        | 152   | 34.2%   |
| TIA or stroke              | 27    | 6.1%    |
| Neither                    | 273   | 61.5%   |
| Total (N): all respondents | 444   |         |

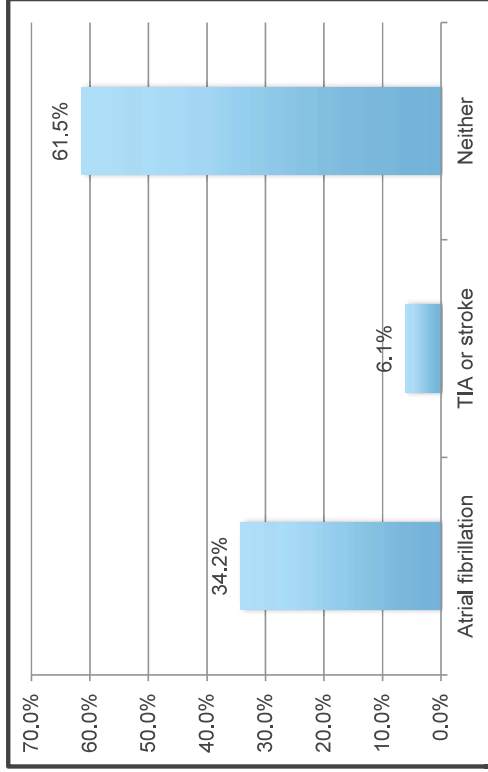

**Q13A NEW: Include only yes responders to Afib** If you were diagnosed with atrial fibrillation-- how do you define your atrial fibrillation?

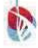

| Response                                                        | Count | Percent |
|-----------------------------------------------------------------|-------|---------|
| Only occasional (paroxysmal - comes and goes)                   | 120   | 78.9%   |
| Present all the time (chronic - all the time)                   | 30    | 19.7%   |
| Total (N): all respondents stating "yes" to diagnosed with Afib | 152   |         |

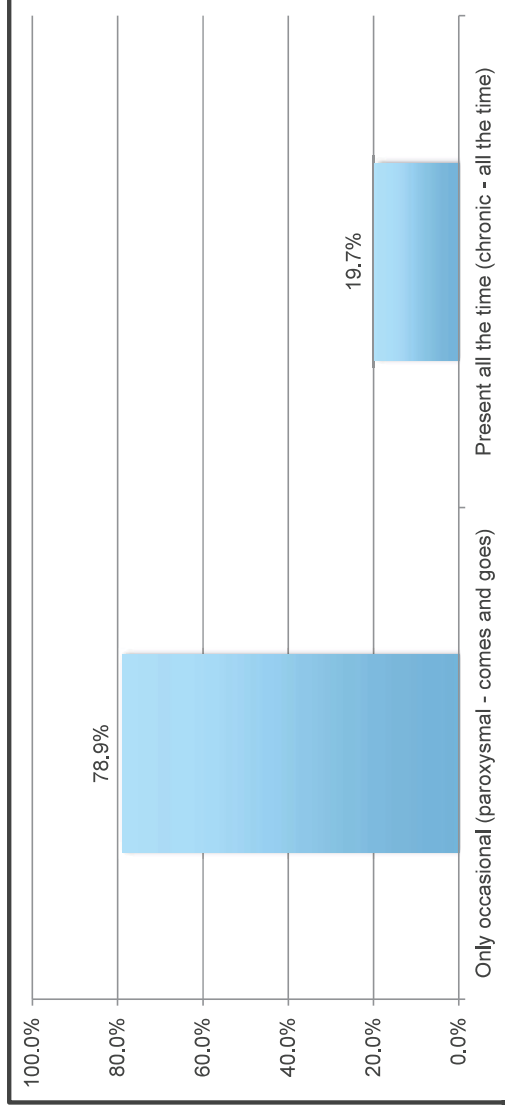

**Q14A NEW: Include only yes responders to Afib** Have you ever been cardioverted (with defibrillation from an external device) to treat your atrial fibrillation?

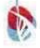

| Response                                                        | Count | Percent |
|-----------------------------------------------------------------|-------|---------|
| Never                                                           | 73    | 48.0%   |
| Once                                                            | 28    | 18.4%   |
| 2 to 5 times                                                    | 33    | 21.7%   |
| 6 to 10 times                                                   | 10    | 6.6%    |
| 10 to 20 times                                                  | 6     | 3.9%    |
| More than 20 times                                              | 2     | 1.3%    |
| Total (N): all respondents stating "yes" to diagnosed with Afib | 152   |         |

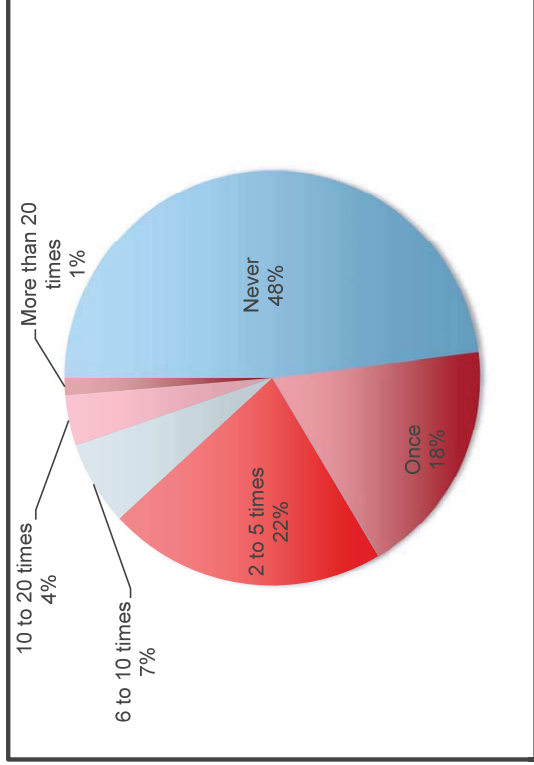

**Q15A NEW: Include only yes responders to Afib** Regarding the management of your atrial fibrillation-- what methods have been used to treat it? (Check all that apply)

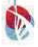

| Response                                                        | Count | Percent |
|-----------------------------------------------------------------|-------|---------|
| Medication                                                      | 117   | 77.0%   |
| RFA - Radio Frequency Ablation - PVA or pathway                 | 30    | 19.7%   |
| Surgical - MAZE                                                 | 20    | 13.2%   |
| None                                                            | 22    | 14.5%   |
| Total (N): all respondents stating "yes" to diagnosed with Afib | 152   |         |

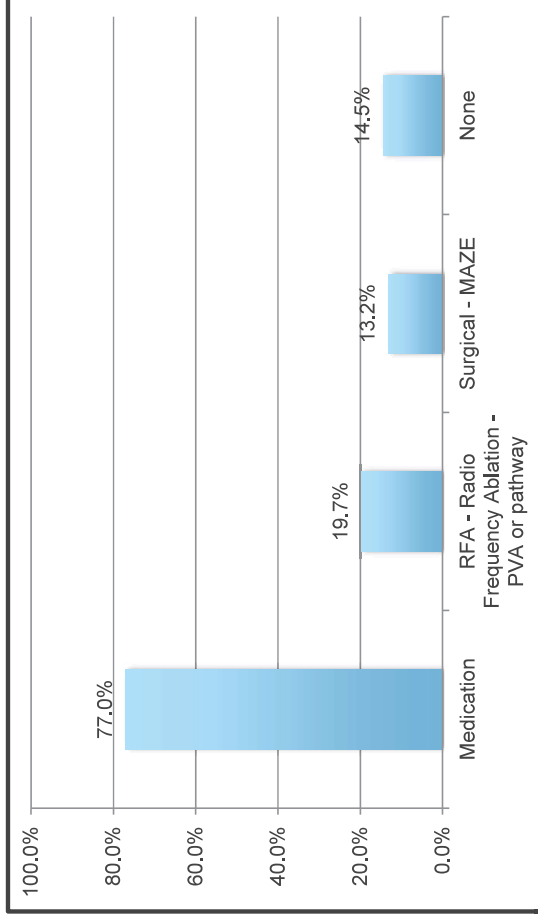

### Q16 Have you experienced any of the following? (Check all that apply)

| Response                                           | Count | Percent |
|----------------------------------------------------|-------|---------|
| Tiredness                                          | 329   | 74.1%   |
| Shortness of breath when you try to exert yourself | 326   | 73.4%   |
| Shortness of breath after meals                    | 218   | 49.1%   |
| Shortness of breath when lying flat                | 191   | 43.0%   |
| Light-headedness                                   | 310   | 69.8%   |
| Dizziness after exertion                           | 239   | 53.8%   |
| Fainting spells                                    | 108   | 24.3%   |
| Palpitations                                       | 283   | 63.7%   |
| Exercise intolerance                               | 251   | 56.5%   |
| Chest Pain (chest-- upper back-- jaw)              | 171   | 38.5%   |
| Chest Pain upon exertion                           | 163   | 36.7%   |
| Other                                              | 27    | 6.1%    |
| Total (N): all respondents                         | 444   |         |

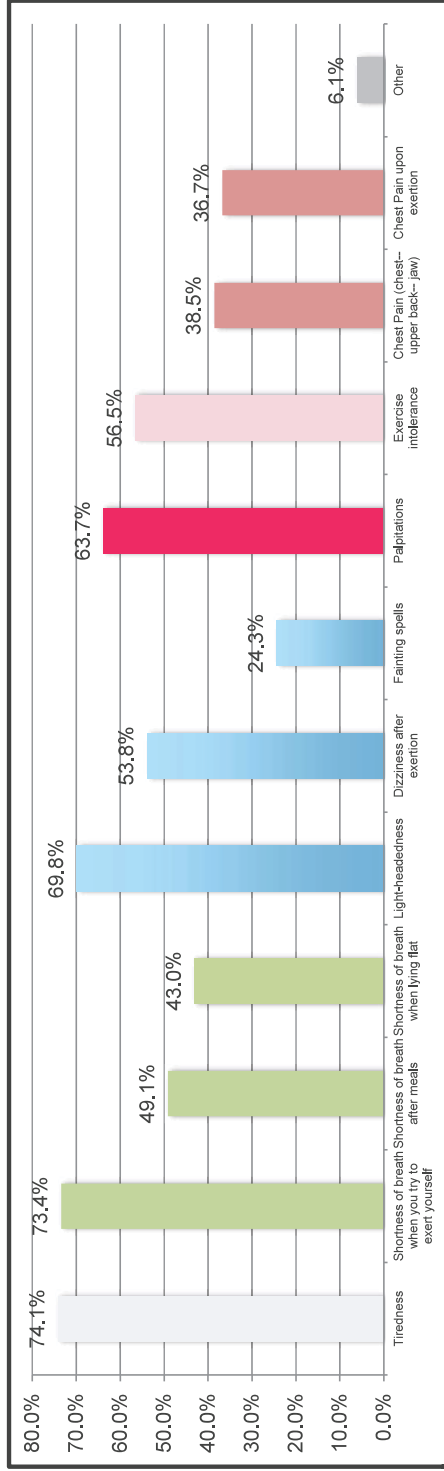

## Q16A NEW Number of Symptoms, Segmented by Obstruction

| Response     | All patients |         | Obstructive |         | Non-Obstructive |         |
|--------------|--------------|---------|-------------|---------|-----------------|---------|
|              | Count        | Percent | Count       | Percent | Count           | Percent |
| None         | 21           | 4.7%    | 4           | 1.6%    | 13              | 8.9%    |
| One          | 31           | 7.0%    | 8           | 3.1%    | 21              | 14.4%   |
| Two          | 34           | 7.7%    | 15          | 5.9%    | 16              | 11.0%   |
| Three        | 37           | 8.3%    | 14          | 5.5%    | 16              | 11.0%   |
| Four         | 39           | 8.8%    | 21          | 8.2%    | 10              | 6.8%    |
| Five         | 40           | 9.0%    | 25          | 9.8%    | 10              | 6.8%    |
| Six          | 46           | 10.4%   | 29          | 11.3%   | 13              | 8.9%    |
| Seven        | 39           | 8.8%    | 26          | 10.2%   | 12              | 8.2%    |
| Eight        | 35           | 7.9%    | 25          | 9.8%    | 7               | 4.8%    |
| Nine or more | 122          | 27.5%   | 89          | 34.8%   | 28              | 19.2%   |
| Total        | 444          |         | 256         |         | 146             |         |

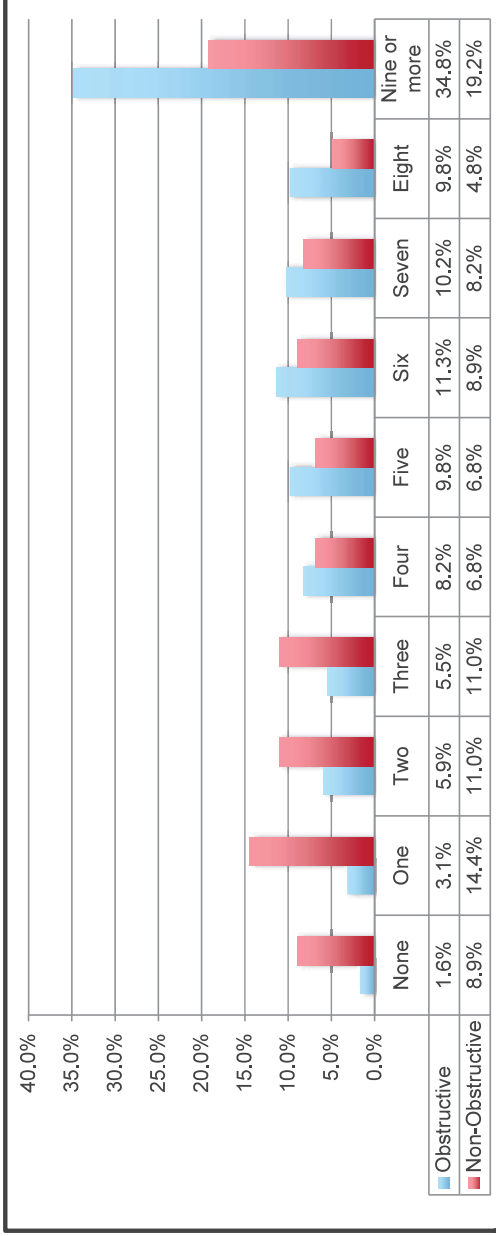



**Q16B NEW Segment by obstruction** Have you experienced any of the following?  
 (Check all that apply)

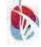

| Response                                           | All patients |         | Obstructive |         | Non-obstructive |         |
|----------------------------------------------------|--------------|---------|-------------|---------|-----------------|---------|
|                                                    | Count        | Percent | Count       | Percent | Count           | Percent |
| Tiredness                                          | 329          | 74.1%   | 215         | 84.0%   | 85              | 58.2%   |
| Shortness of breath when you try to exert yourself | 326          | 73.4%   | 213         | 83.2%   | 82              | 56.2%   |
| Shortness of breath after meals                    | 218          | 49.1%   | 152         | 59.4%   | 53              | 36.3%   |
| Shortness of breath when lying flat                | 191          | 43.0%   | 131         | 51.2%   | 47              | 32.2%   |
| Light-headedness                                   | 310          | 69.8%   | 198         | 77.3%   | 87              | 59.6%   |
| Dizziness after exertion                           | 239          | 53.8%   | 163         | 63.7%   | 60              | 41.1%   |
| Fainting spells                                    | 108          | 24.3%   | 75          | 29.3%   | 29              | 19.9%   |
| Palpitations                                       | 283          | 63.7%   | 173         | 67.6%   | 89              | 61.0%   |
| Exercise intolerance                               | 251          | 56.5%   | 174         | 68.0%   | 64              | 43.8%   |
| Chest Pain (chest-- upper back-- jaw)              | 171          | 38.5%   | 118         | 46.1%   | 41              | 28.1%   |
| Chest Pain upon exertion                           | 163          | 36.7%   | 115         | 44.9%   | 40              | 27.4%   |
| Other                                              | 27           | 6.1%    | 14          | 5.5%    | 8               | 5.5%    |
| Total (N)                                          | 444          |         | 256         |         | 146             |         |

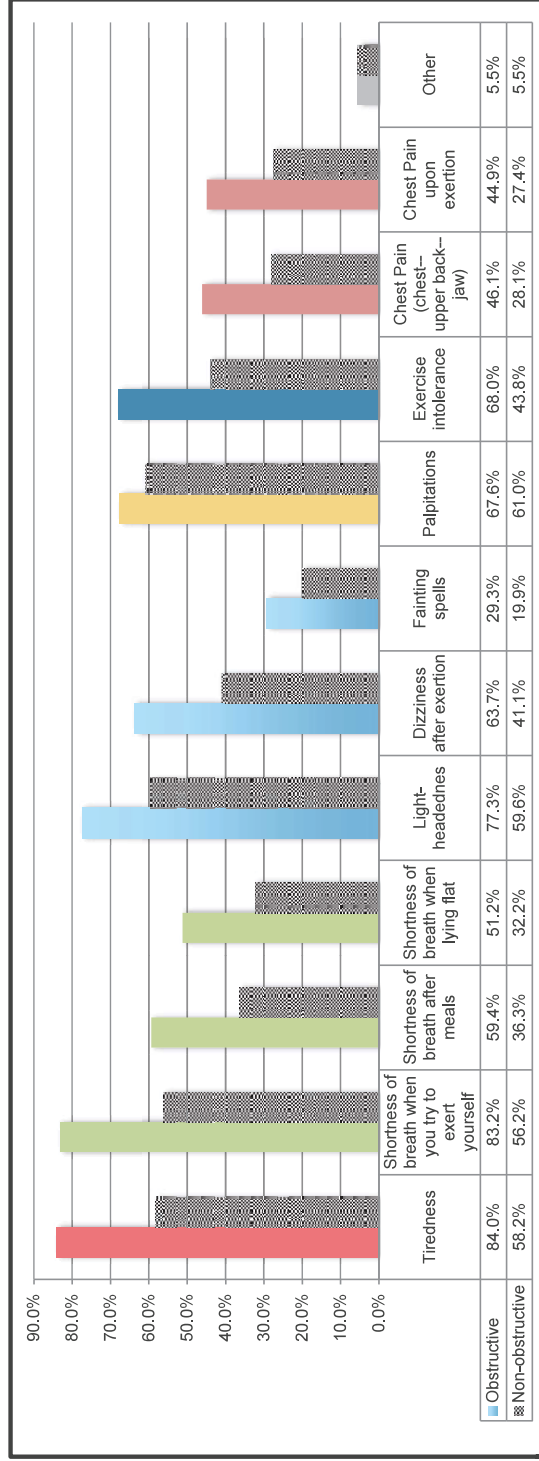

## Q17 What was the time period between when you first started having symptoms until you saw your physician?



| Response                                                        | Count | Percent |
|-----------------------------------------------------------------|-------|---------|
| I have not developed symptoms / I do not feel I have "symptoms" | 65    | 15.1%   |
| Less than 3 months                                              | 168   | 39.0%   |
| 3 months to 1 year                                              | 94    | 21.8%   |
| 1-3 years                                                       | 36    | 8.4%    |
| 3-5 years                                                       | 18    | 4.2%    |
| More than 5 years                                               | 50    | 11.6%   |
| Total                                                           | 431   |         |

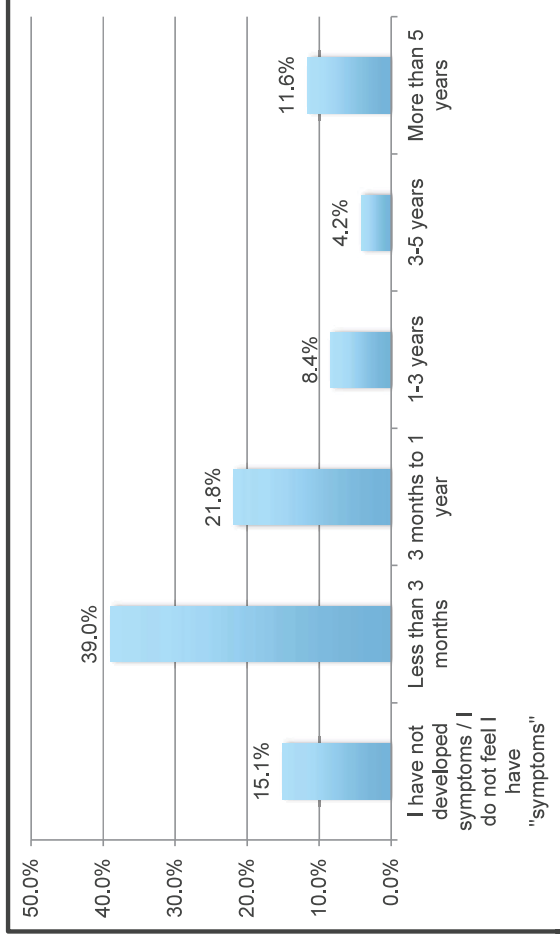

## Q18 How would you rate your symptoms?

| Response                                                                                                                                                                                                                               | Count | Percent | NYHA |
|----------------------------------------------------------------------------------------------------------------------------------------------------------------------------------------------------------------------------------------|-------|---------|------|
| No limitation of physical activity. Ordinary physical activity does not cause undue fatigue-- palpitation-- dyspnea (shortness of breath).                                                                                             | 91    | 21.0%   | I    |
| Slight limitation of physical activity. Comfortable at rest. Ordinary physical activity results in fatigue-- palpitation-- dyspnea (shortness of breath).                                                                              | 183   | 42.2%   | II   |
| Marked limitation of physical activity. Comfortable at rest. Less than ordinary activity causes fatigue-- palpitation-- or dyspnea.                                                                                                    | 136   | 31.3%   | III  |
| Unable to carry on any physical activity without discomfort. Even at rest symptoms include dyspnea (shortness of breath)-- fatigue-- fainting (syncope) and chest pain. If any physical activity is undertaken-- discomfort increases. | 24    | 5.5%    | IV   |
| Total                                                                                                                                                                                                                                  | 434   |         |      |

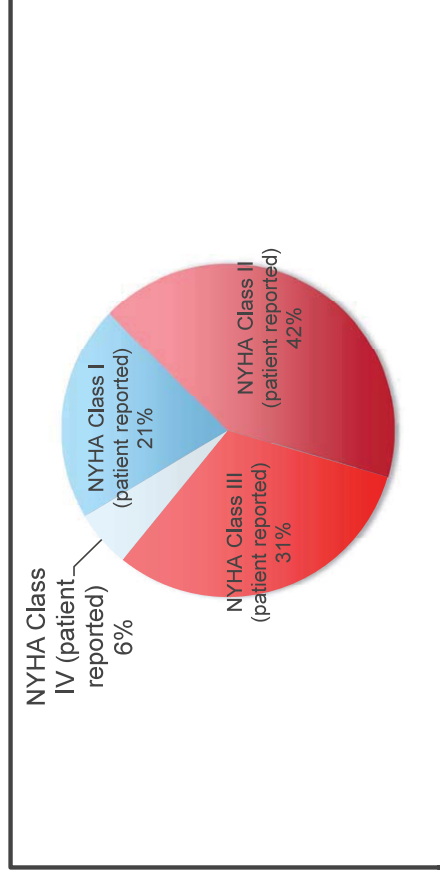

**Q18B NEW: Segment by obstruction and symptoms** Proportion of patients with obstruction and symptoms



| Response                          | Count | Percent |
|-----------------------------------|-------|---------|
| Obstructive, NYHA Class I         | 28    | 7.1%    |
| Obstructive, NYHA Class II-IV     | 223   | 56.5%   |
| Non-Obstructive, NYHA Class I     | 53    | 13.4%   |
| Non-Obstructive, NYHA Class II-IV | 91    | 23.0%   |
| Total                             | 395   |         |

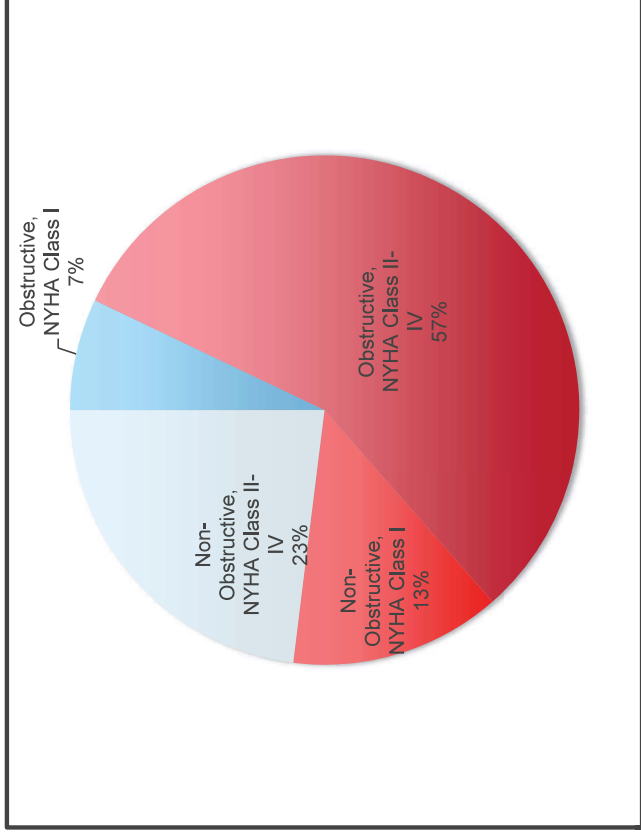

## Q18C NEW: Segment by patient origination How would you rate your symptoms?

| Response                          | All Patients |         | Symptoms |         | Unrelated Med Investig. |         | Screening |         |
|-----------------------------------|--------------|---------|----------|---------|-------------------------|---------|-----------|---------|
|                                   | Count        | Percent | Count    | Percent | Count                   | Percent | Count     | Percent |
| NYHA Class I (patient reported)   | 91           | 21.0%   | 28       | 12.1%   | 43                      | 31.6%   | 20        | 30.3%   |
| NYHA Class II (patient reported)  | 183          | 42.2%   | 96       | 41.4%   | 60                      | 44.1%   | 27        | 40.9%   |
| NYHA Class III (patient reported) | 136          | 31.3%   | 92       | 39.7%   | 27                      | 19.9%   | 17        | 25.8%   |
| NYHA Class IV (patient reported)  | 24           | 5.5%    | 16       | 6.9%    | 6                       | 4.4%    | 2         | 3.0%    |
| Total                             | 434          |         | 232      |         | 136                     |         | 66        |         |

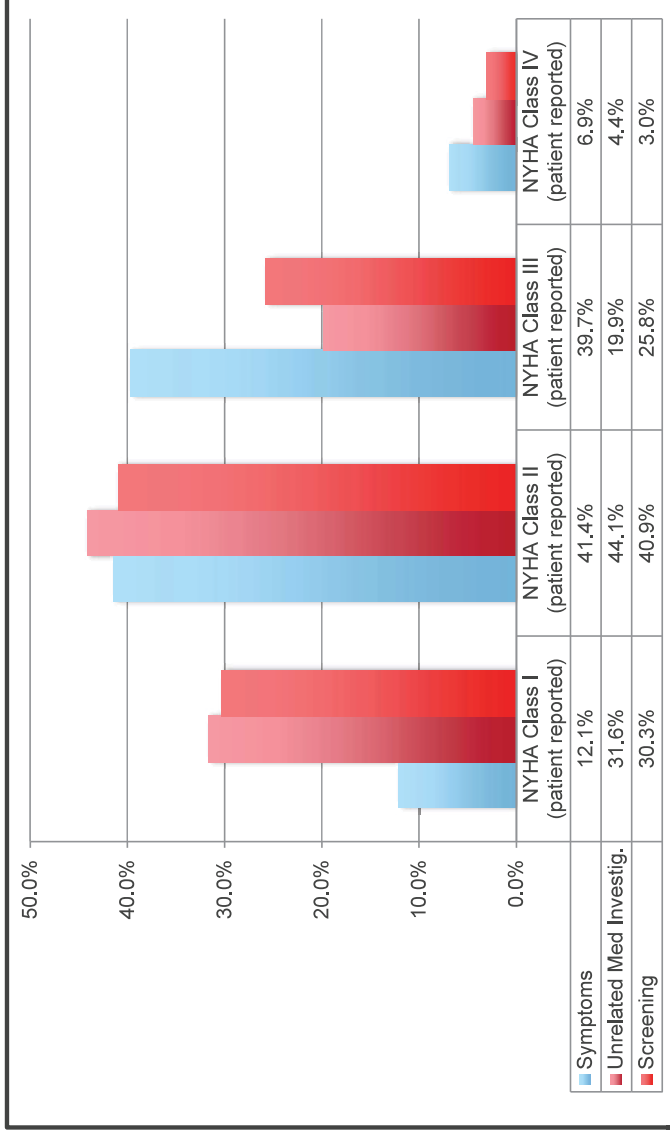

## Q18E NEW: Segment by obstruction and symptoms Proportion of patients with obstruction and symptoms



| All Patients                    |            |         |  |
|---------------------------------|------------|---------|--|
| Response                        | Count      | Percent |  |
| Obstructive, NYHA Class I       | 28         | 7.1%    |  |
| Obstructive, NYHA Class II      | 115        | 29.1%   |  |
| Obstructive, NYHA Class III     | 97         | 24.6%   |  |
| Obstructive, NYHA Class IV      | 11         | 2.8%    |  |
| Non-Obstructive, NYHA Class I   | 53         | 13.4%   |  |
| Non-Obstructive, NYHA Class II  | 52         | 13.2%   |  |
| Non-Obstructive, NYHA Class III | 29         | 7.3%    |  |
| Non-Obstructive, NYHA Class IV  | 10         | 2.5%    |  |
| <b>Total</b>                    | <b>395</b> |         |  |

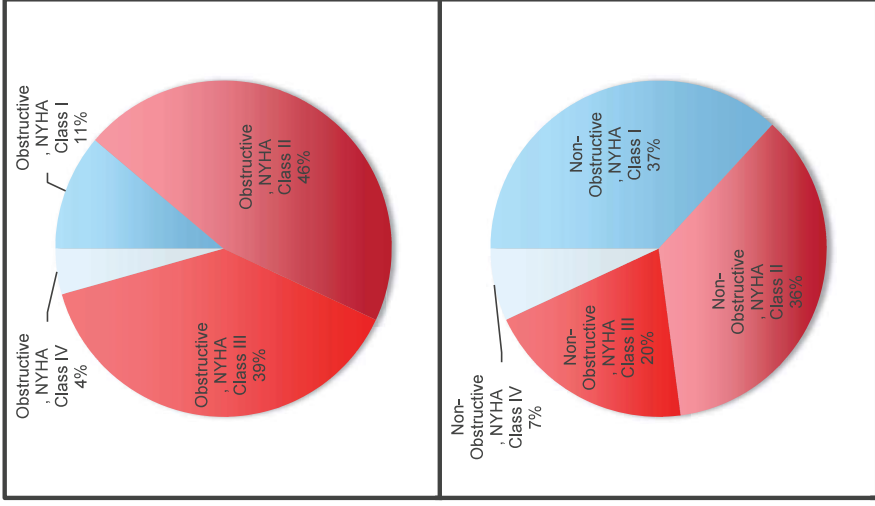

| Obstructive                 |            |         |  |
|-----------------------------|------------|---------|--|
| Response                    | Count      | Percent |  |
| Obstructive, NYHA Class I   | 28         | 11.2%   |  |
| Obstructive, NYHA Class II  | 115        | 45.8%   |  |
| Obstructive, NYHA Class III | 97         | 38.6%   |  |
| Obstructive, NYHA Class IV  | 11         | 4.4%    |  |
| <b>Total</b>                | <b>251</b> |         |  |

| Non-Obstructive                 |            |         |  |
|---------------------------------|------------|---------|--|
| Response                        | Count      | Percent |  |
| Non-Obstructive, NYHA Class I   | 53         | 36.8%   |  |
| Non-Obstructive, NYHA Class II  | 52         | 36.1%   |  |
| Non-Obstructive, NYHA Class III | 29         | 20.1%   |  |
| Non-Obstructive, NYHA Class IV  | 10         | 6.9%    |  |
| <b>Total</b>                    | <b>144</b> |         |  |

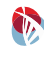

**Q19 What was the time period between when you first experienced symptoms-- and mentioned them to a doctor-- until you were diagnosed with HCM?**



| Response                          | Count | Percent |
|-----------------------------------|-------|---------|
| Less than 3 months                | 156   | 36.5%   |
| 3 months to 1 year                | 60    | 14.1%   |
| 1-3 years                         | 48    | 11.2%   |
| 3-5 years                         | 28    | 6.6%    |
| More than 5 years                 | 80    | 18.7%   |
| I have never experienced symptoms | 55    | 12.9%   |
| Total                             | 427   |         |

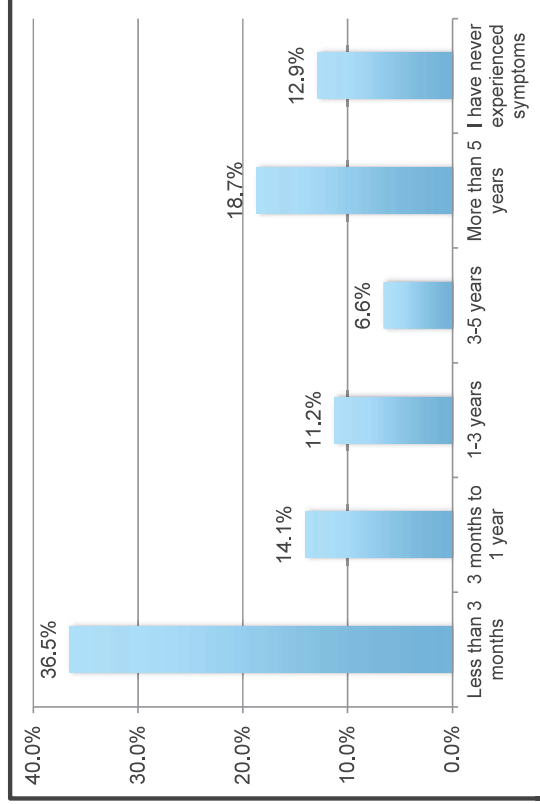

**Q20 How many living people in your family are known to have HCM or be genetic mutation carriers? (please remember to include those who have received heart transplantation)**

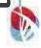

| Response    | Count | Percent |
|-------------|-------|---------|
| One         | 204   | 57.3%   |
| two to five | 117   | 32.9%   |
| six to nine | 23    | 6.5%    |
| 10+         | 12    | 3.4%    |
| Total       | 356   |         |

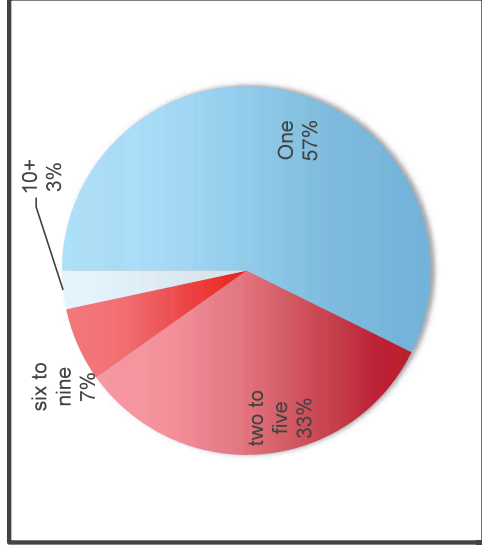



## Q21 How would you describe your diagnosis of HCM?

| Response                                                                                                                       | Count | Percent |
|--------------------------------------------------------------------------------------------------------------------------------|-------|---------|
| Familial (runs in the family)                                                                                                  | 209   | 47.6%   |
| Believed to be sporadic (I am the only member of my family known to have HCM)                                                  | 131   | 29.8%   |
| Associated with the diagnosis of another condition (for instance-- Noonan Syndrome-- Pompe Disease-- Danon Disease-- or other) | 4     | 0.9%    |
| I don't know                                                                                                                   | 95    | 21.6%   |
| Total                                                                                                                          | 439   |         |

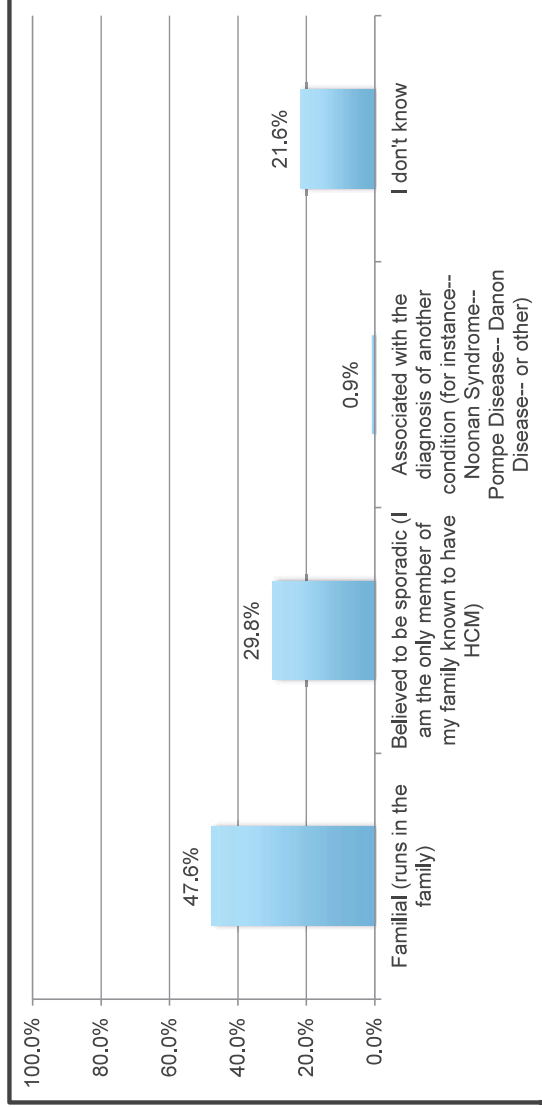

**Q22 Have there been any HCM related deaths in your family? Please include sudden death, heart failure or strokes in those with HCM.**



| Response | Count | Percent |
|----------|-------|---------|
| Yes      | 145   | 33.0%   |
| No       | 149   | 33.9%   |
| Unsure   | 146   | 33.2%   |
| Total    | 440   |         |

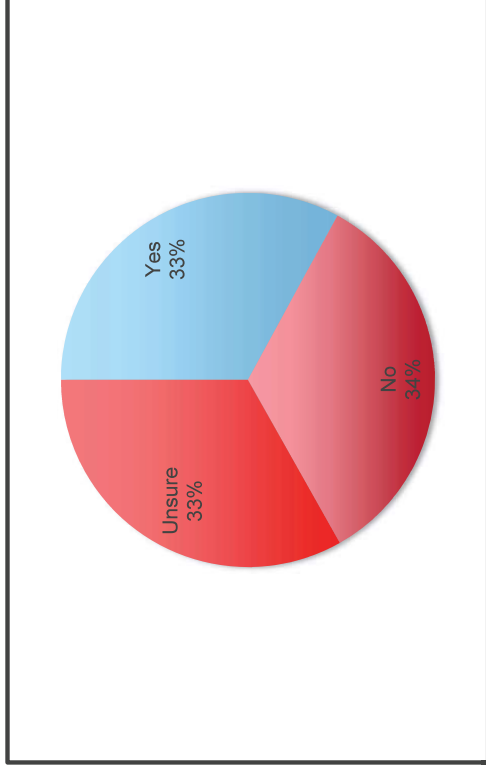

**Q23 Are you seeing a cardiologist who specializes in HCM and is located in a university center or at a hospital clinic for cardiomyopathy? This includes an HCMA recognized Center of Excellence.**

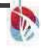

| Response                                                                                                                          | Count | Percent |
|-----------------------------------------------------------------------------------------------------------------------------------|-------|---------|
| Yes-- I see a Cardiologist at either an HCMA recognized Center of Excellence or a University Center with a Cardiomyopathy program | 301   | 68.4%   |
| No                                                                                                                                | 139   | 31.6%   |
| Total                                                                                                                             | 440   |         |

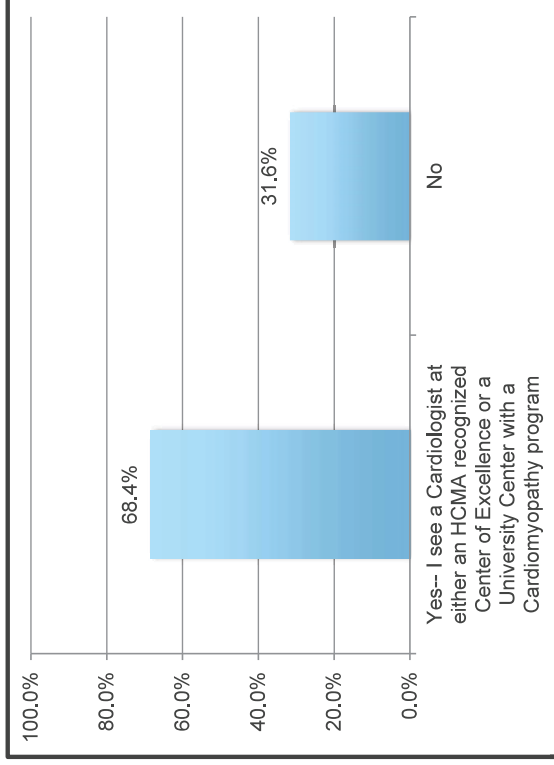

**Q24A NEW: Include only yes responders to seeing HCM spec If yes-- how often do you see your HCM specialist to monitor your HCM?**



| Response              | Count | Percent |
|-----------------------|-------|---------|
| Every 3 months        | 25    | 8.4%    |
| Every 6 months        | 94    | 31.5%   |
| Annually              | 129   | 43.3%   |
| Every 2 years         | 28    | 9.4%    |
| Every 3 or more years | 22    | 7.4%    |
| Total                 | 298   |         |

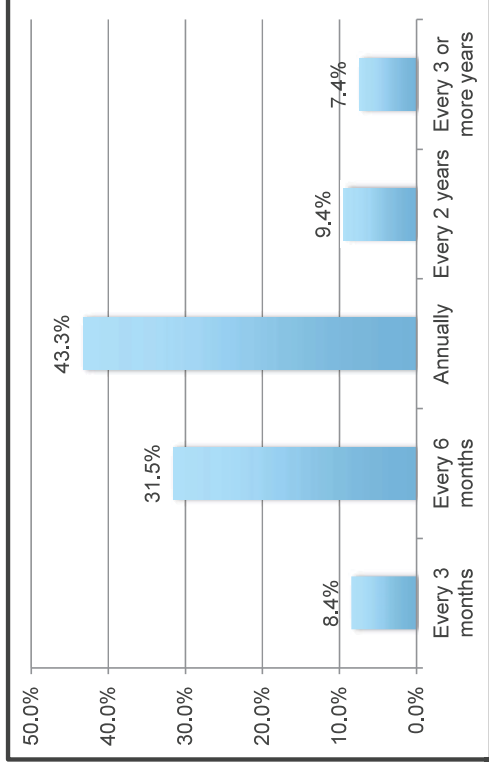

**Q25A NEW: Include only yes responders to seeing HCM spec If yes-- how far do you travel to see your HCM specialist?**

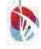

| Response            | Count | Percent |
|---------------------|-------|---------|
| <10 miles           | 49    | 16.3%   |
| 10 to <30 miles     | 48    | 16.0%   |
| 30 to <50 miles     | 51    | 17.0%   |
| 50 to <100 miles    | 39    | 13.0%   |
| More than 100 miles | 113   | 37.7%   |
| Total               | 300   |         |

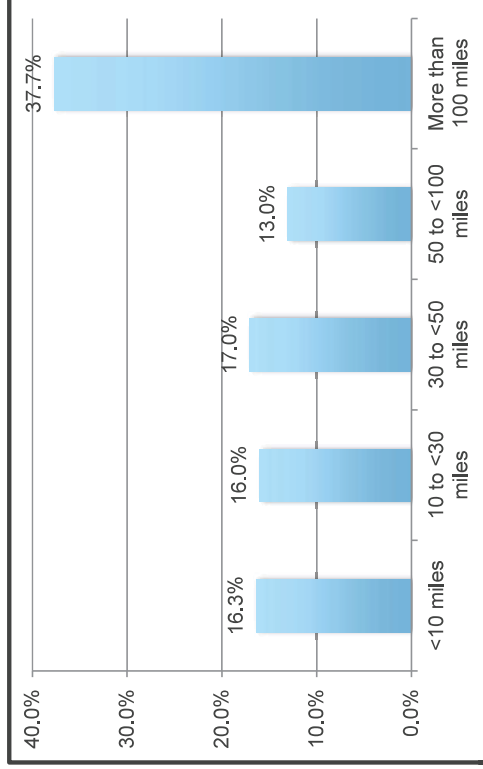

**Q26A NEW: Include only yes responders to seeing HCM spec If yes-- how many HCM specialists have you seen in the past 5 years?**



| Response     | Count | Percent |
|--------------|-------|---------|
| One          | 151   | 50.3%   |
| Two          | 100   | 33.3%   |
| Three        | 36    | 12.0%   |
| Four         | 5     | 1.7%    |
| Five or more | 8     | 2.7%    |
| Total        | 300   |         |

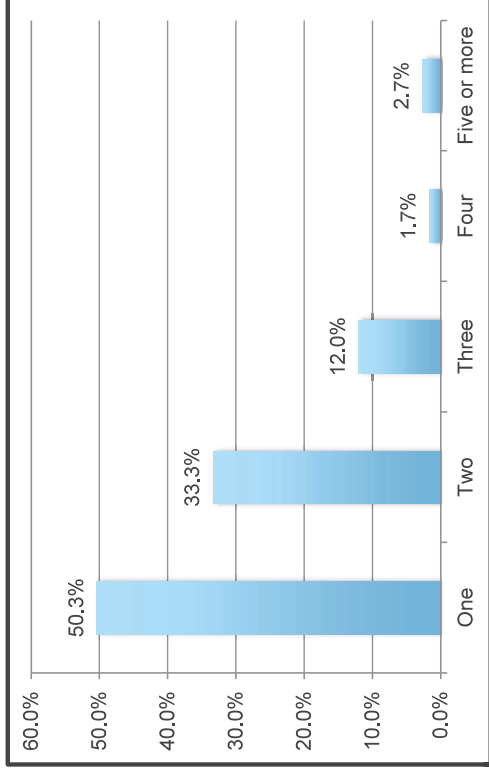

**Q27 Are you seeing a general cardiologist-- who does not specialize in HCM?**



| Response | Count | Percent |
|----------|-------|---------|
| Yes      | 269   | 60.7%   |
| No       | 174   | 39.3%   |
| Total    | 443   |         |

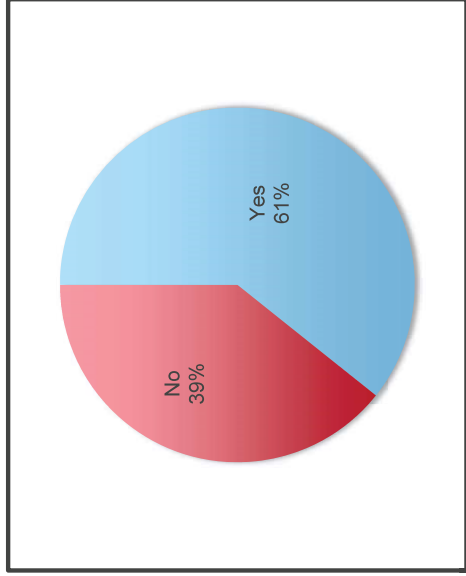

**Q28A NEW: Include only yes responders to seeing gen card** If yes-- how often do you check in with your general cardiologist to monitor your HCM?



| Response              | Count | Percent |
|-----------------------|-------|---------|
| Every 3 months        | 48    | 18.2%   |
| Every 6 months        | 117   | 44.3%   |
| Annually              | 87    | 33.0%   |
| Every 2 years         | 9     | 3.4%    |
| Every 3 or more years | 3     | 1.1%    |
| Total                 | 264   |         |

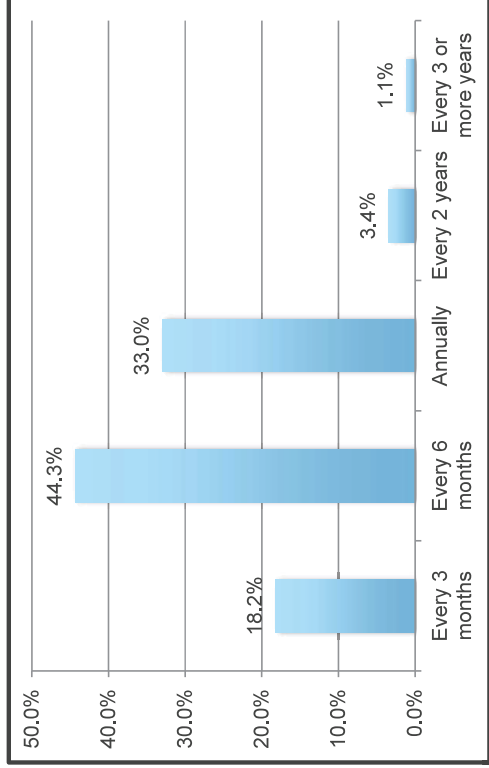



**Q29A NEW: Include only yes responders to seeing gen card** If yes-- how far do you travel to see your general cardiologist?

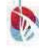

| Response            | Count | Percent |
|---------------------|-------|---------|
| <10 miles           | 138   | 51.9%   |
| 10 to <30 miles     | 79    | 29.7%   |
| 30 to <50 miles     | 25    | 9.4%    |
| 50 to <100 miles    | 18    | 6.8%    |
| More than 100 miles | 6     | 2.3%    |
| Total               | 266   |         |

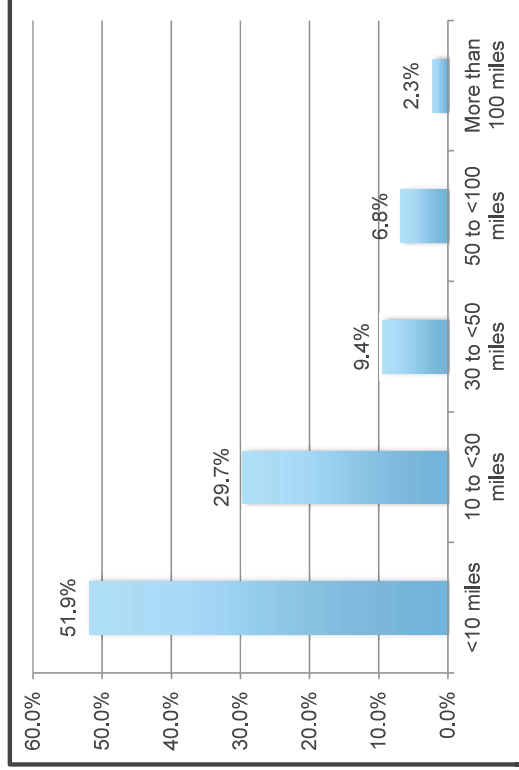

**Q30A NEW: Include only yes responders to seeing gen card** If yes-- how many general cardiologists have you seen in the past 5 years?



| Response     | Count | Percent |
|--------------|-------|---------|
| One          | 101   | 37.8%   |
| Two          | 104   | 39.0%   |
| Three        | 42    | 15.7%   |
| Four         | 8     | 3.0%    |
| Five or more | 12    | 4.5%    |
| Total        | 267   |         |

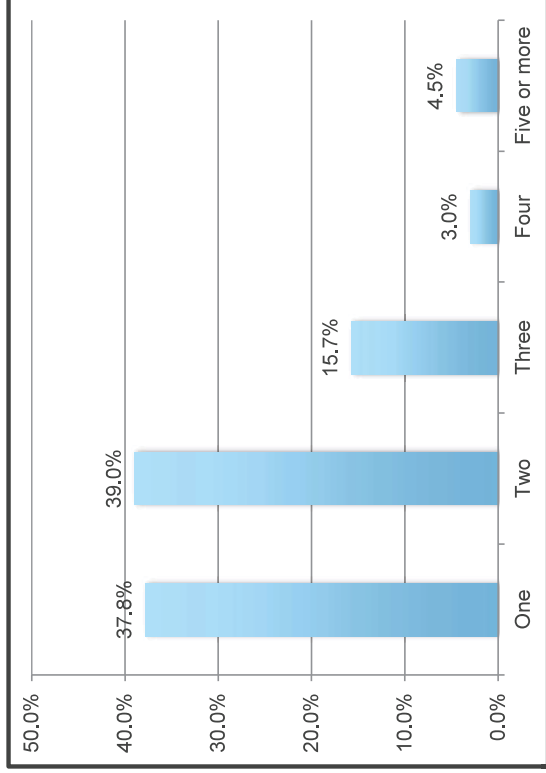

**Q31 Which of the following medications do you currently take? (Check all that apply)**

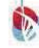

**If you have switched from one medication to another within the same class please check the box that best applies - example: it is common to switch from one beta blocker to a different one. In this case you would check Beta Blocker both in the area of taking and previously taken (the next question).**

| Response                                                                                         | Count | Percent |
|--------------------------------------------------------------------------------------------------|-------|---------|
| Beta blockers (propranolol-- nadolol-- atenolol-- acebutolol-- metoprolol-- Lopressor-- Inderal) | 315   | 70.9%   |
| Calcium channel blockers (diazetam-- nifedipine-- verapamil)                                     | 105   | 23.6%   |
| Diuretics (HCZT-- Lasix-- Torsemide-- Spironolactone)                                            | 104   | 23.4%   |
| Anticoagulant medications (blood thinners)                                                       | 101   | 22.7%   |
| Other                                                                                            | 48    | 10.8%   |
| ACE inhibitors ("-prils" or ARBs ("-sartans"))                                                   | 38    | 8.6%    |
| Antiarrhythmic medications (like amiodarone)                                                     | 38    | 8.6%    |
| Disopyramide (Norpace)                                                                           | 34    | 7.7%    |
| Aldosterone antagonists (aldactone or eplerenone)                                                | 8     | 1.8%    |
| Total (N): all respondents                                                                       | 444   |         |

**Q31 Which of the following medications do you currently take? (Check all that apply)**

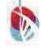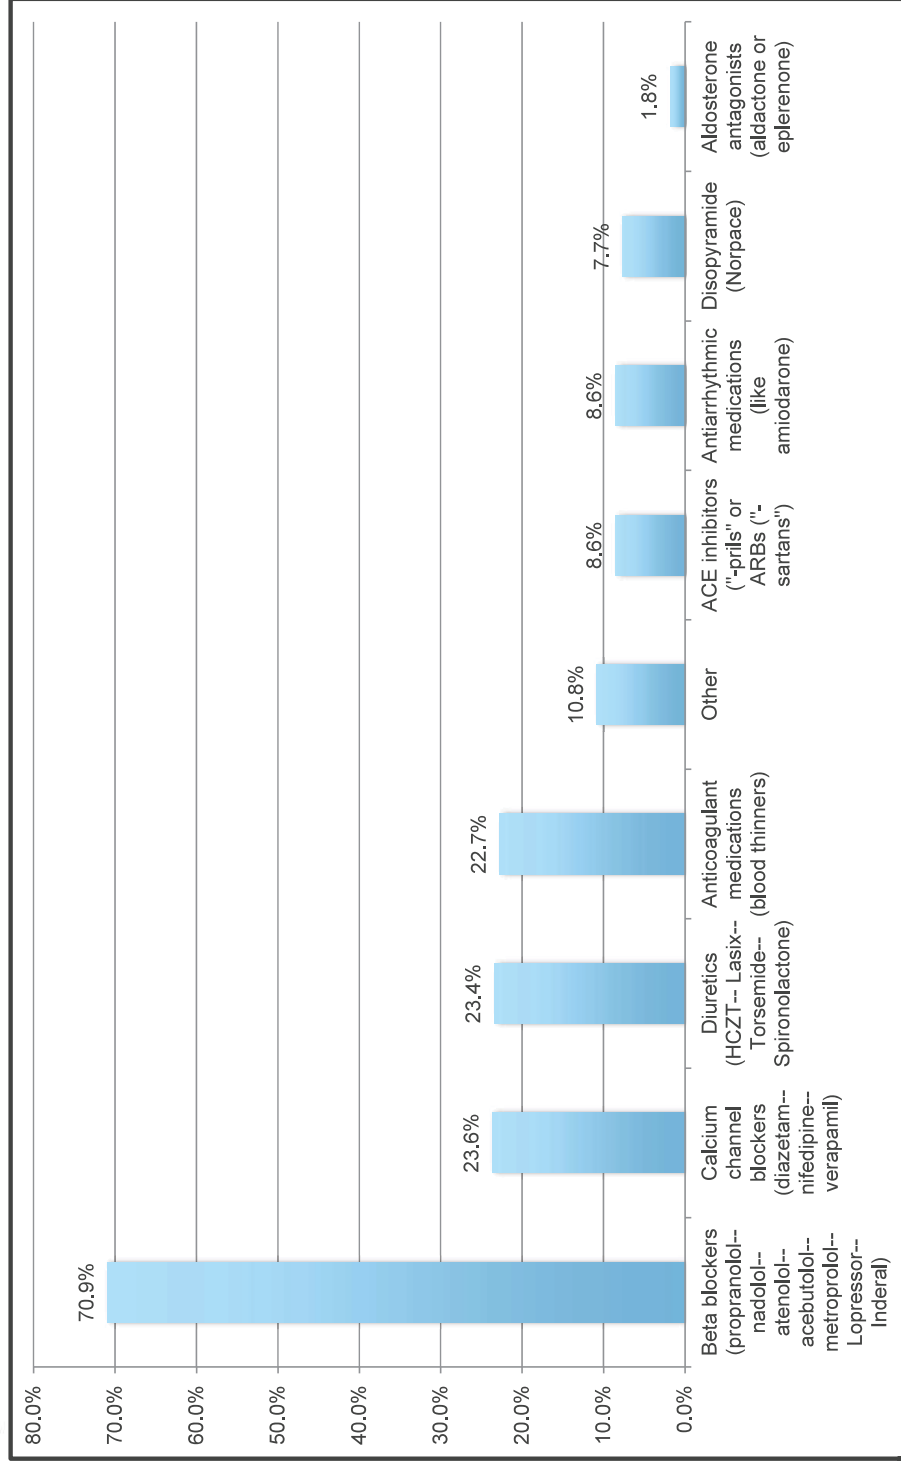

**Q31A NEW: Segment by NYHA Class** Which of the following medications do you currently take? (Check all that apply)

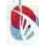

If you have switched from one medication to another within the same class please check the box that best applies - example: it is common to switch from one beta blocker to a different one. In this case you would check Beta Blocker both in the area of taking and previously taken (the next question).

| Response                                                                                         | All Patients |         | NYHA I |         | NYHA II |         | NYHA III |         | NYHA IV |         | NYHA II-IV |         |
|--------------------------------------------------------------------------------------------------|--------------|---------|--------|---------|---------|---------|----------|---------|---------|---------|------------|---------|
|                                                                                                  | Count        | Percent | Count  | Percent | Count   | Percent | Count    | Percent | Count   | Percent | Count      | Percent |
| Beta blockers (propranolol-- nadolol-- atenolol-- acebutolol-- metoprolol-- Lopressor-- Inderal) | 315          | 70.9%   | 56     | 61.5%   | 133     | 72.7%   | 103      | 75.7%   | 16      | 66.7%   | 252        | 73.5%   |
| Calcium channel blockers (diazetam-- nifedipine-- verapamil)                                     | 105          | 23.6%   | 14     | 15.4%   | 49      | 26.8%   | 36       | 26.5%   | 5       | 20.8%   | 90         | 26.2%   |
| Diuretics (HCZT-- Lasix-- Torsemide-- Spironolactone)                                            | 104          | 23.4%   | 13     | 14.3%   | 32      | 17.5%   | 47       | 34.6%   | 11      | 45.8%   | 90         | 26.2%   |
| Anticoagulant medications (blood thinners)                                                       | 101          | 22.7%   | 16     | 17.6%   | 40      | 21.9%   | 35       | 25.7%   | 8       | 33.3%   | 83         | 24.2%   |
| Other                                                                                            | 48           | 10.8%   | 9      | 9.9%    | 15      | 8.2%    | 17       | 12.5%   | 5       | 20.8%   | 37         | 10.8%   |
| ACE inhibitors ("-prils" or ARBs ("sartans"))                                                    | 38           | 8.6%    | 4      | 4.4%    | 22      | 12.0%   | 10       | 7.4%    | 2       | 8.3%    | 34         | 9.9%    |
| Antiarrhythmic medications (like amiodarone)                                                     | 38           | 8.6%    | 7      | 7.7%    | 11      | 6.0%    | 16       | 11.8%   | 3       | 12.5%   | 30         | 8.7%    |
| Disopyramide (Norpace)                                                                           | 34           | 7.7%    | 3      | 3.3%    | 15      | 8.2%    | 13       | 9.6%    | 3       | 12.5%   | 31         | 9.0%    |
| Aldosterone antagonists (aldactone or eplerenone)                                                | 8            | 1.8%    | 1      | 1.1%    | 2       | 1.1%    | 4        | 2.9%    | 1       | 4.2%    | 7          | 2.0%    |
| Total (N): all respondents by NYHA class                                                         | 444          |         | 91     |         | 183     |         | 136      |         | 24      |         | 343        |         |

**Q31A NEW: Segment by NYHA Class Which of the following medications do you currently take? (Check all that apply)**

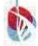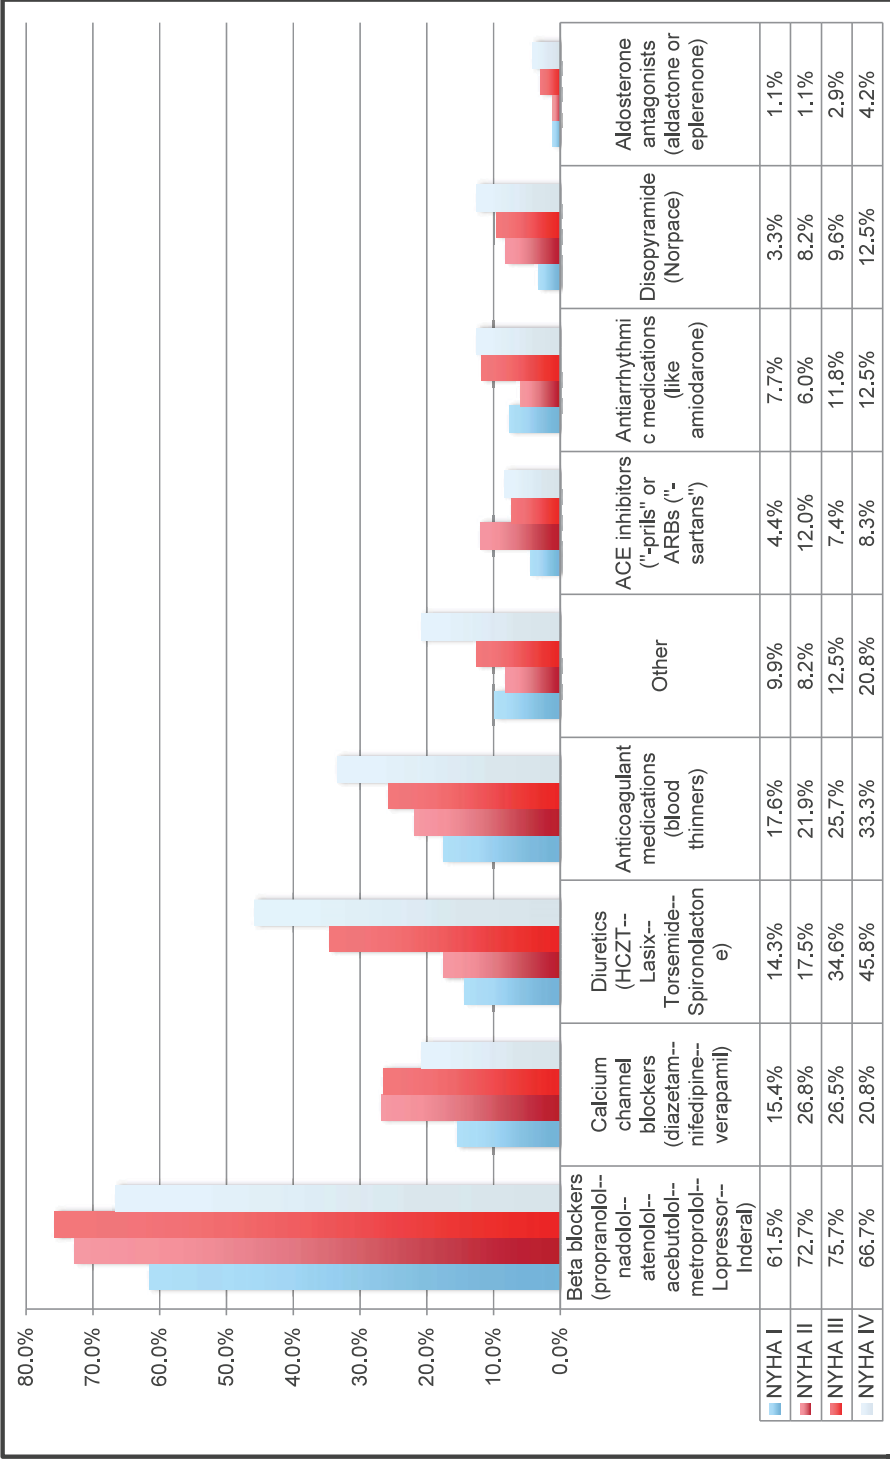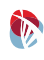

**Q32 Which of the following medications have you taken in the past-- but are no longer taking? (Check all that apply).**



**If you have switched from one medication to another within the same class please check the box that best applies - example: it is common to switch from one beta blocker to a different one in this case you would check Beta Blocker both in the area of taking and previously taken.**

| <b>Response</b>                                                                                  | <b>Count</b> | <b>Percent</b> |
|--------------------------------------------------------------------------------------------------|--------------|----------------|
| Beta blockers (propranolol-- nadolol-- atenolol-- acebutolol-- metoprolol-- Lopressor-- Inderal) | 170          | 38.3%          |
| Calcium channel blockers (diazetam-- nifedipine-- verapamil)                                     | 113          | 25.5%          |
| Disopyramide (Norpace)                                                                           | 53           | 11.9%          |
| Anticoagulant medications (blood thinners)                                                       | 49           | 11.0%          |
| Antiarrhythmic medications (like amiodarone)                                                     | 49           | 11.0%          |
| Diuretics (HCZT-- Lasix-- Torsemide-- Spironolactone)                                            | 48           | 10.8%          |
| ACE inhibitors ("-prils" or ARBs ("-sartans"))                                                   | 35           | 7.9%           |
| Other                                                                                            | 16           | 3.6%           |
| Aldosterone antagonists (aldactone or eplerenone)                                                | 7            | 1.6%           |
| <b>Total (N): all respondents</b>                                                                | <b>444</b>   |                |

**Q32 Which of the following medications have you taken in the past-- but are no longer taking? (Check all that apply).**

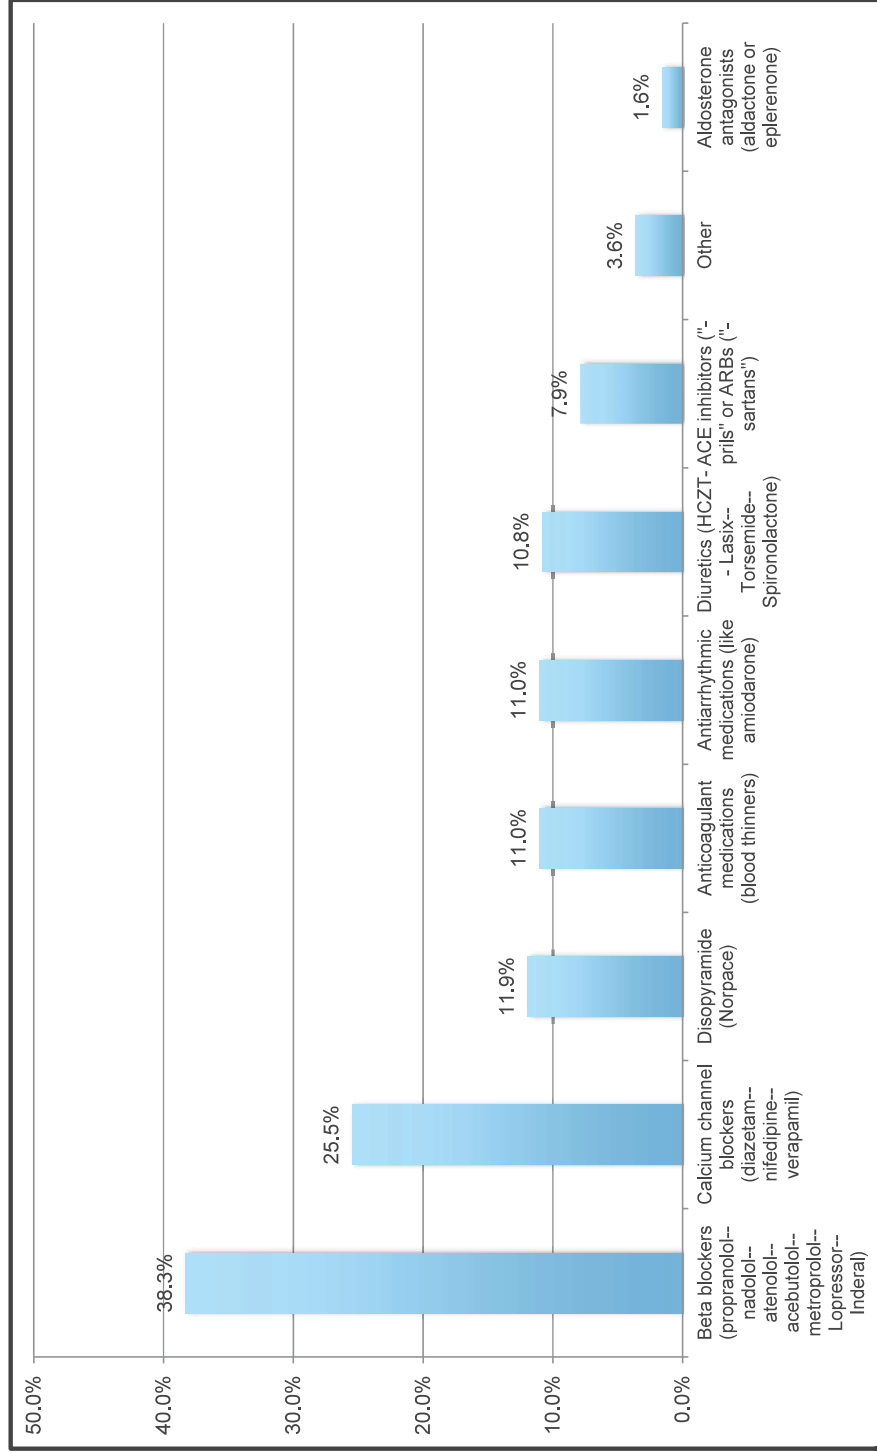



### Q33 How satisfied are you with how well your current medications for HCM work?



| Response          | Count | Percent |
|-------------------|-------|---------|
| Very dissatisfied | 33    | 8.0%    |
| Dissatisfied      | 27    | 6.5%    |
| Neutral           | 101   | 24.4%   |
| Satisfied         | 161   | 38.9%   |
| Very satisfied    | 92    | 22.2%   |
| Total             | 414   |         |

“What are my options?”

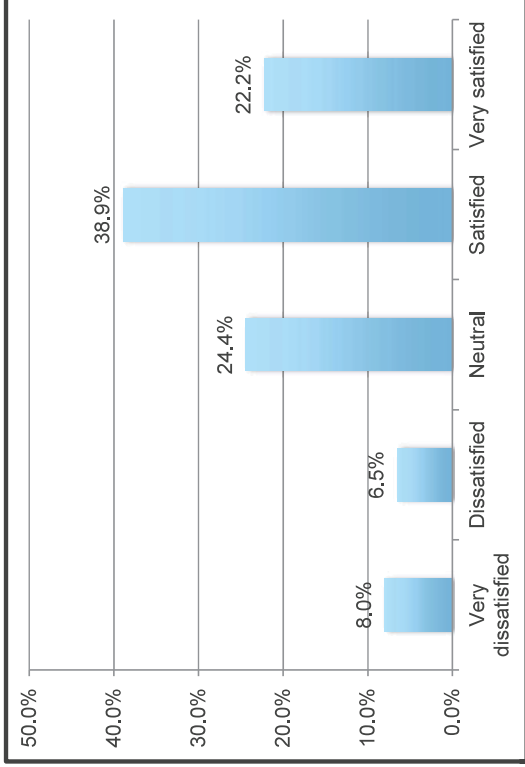

**Q33a New: Segment by NYHA class How satisfied are you with how well your current medications for HCM work?**



| Response          | All Patients |         | Class I |         | Class II-IV |         | Class III-IV |         |
|-------------------|--------------|---------|---------|---------|-------------|---------|--------------|---------|
|                   | Count        | Percent | Count   | Percent | Count       | Percent | Count        | Percent |
| Very dissatisfied | 33           | 8.0%    | 12      | 16.2%   | 20          | 6.0%    | 10           | 6.4%    |
| Dissatisfied      | 27           | 6.5%    | 2       | 2.7%    | 25          | 7.5%    | 15           | 9.6%    |
| Neutral           | 101          | 24.4%   | 16      | 21.6%   | 82          | 24.7%   | 44           | 28.2%   |
| Satisfied         | 161          | 38.9%   | 21      | 28.4%   | 137         | 41.3%   | 63           | 40.4%   |
| Very satisfied    | 92           | 22.2%   | 23      | 31.1%   | 68          | 20.5%   | 24           | 15.4%   |
| Total             | 414          |         | 74      |         | 332         |         | 156          |         |

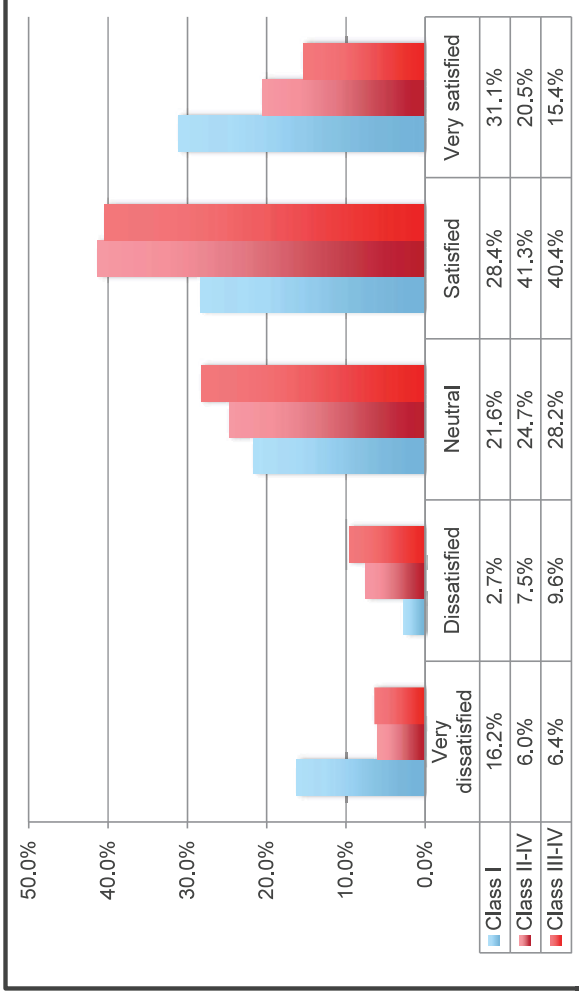

### Q34 When did you start taking daily medications for HCM?



| Response                             | Count | Percent |
|--------------------------------------|-------|---------|
| Not taking daily medications for HCM | 37    | 8.5%    |
| Within the last year                 | 28    | 6.4%    |
| 1 to 2 years ago                     | 37    | 8.5%    |
| 3 or more years ago                  | 335   | 76.7%   |
| Total                                | 437   |         |

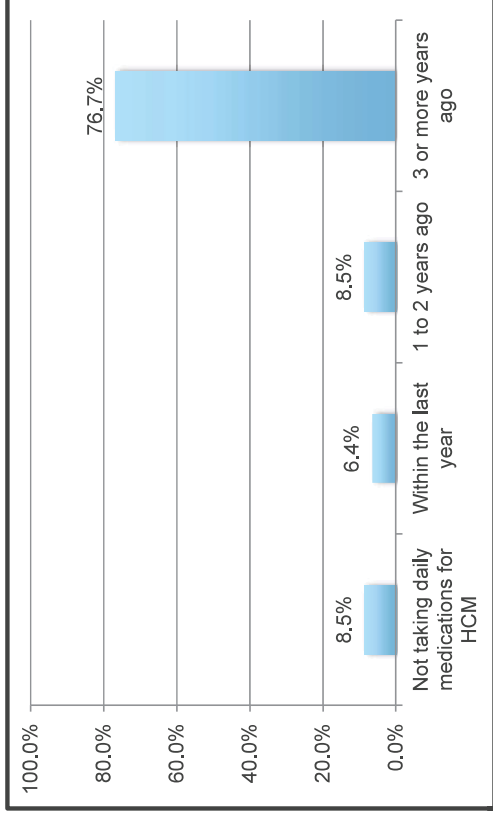

### Q35 How burdensome is your existing medication regimen for HCM?

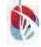

| Response                         | Count | Percent |
|----------------------------------|-------|---------|
| Not at all                       | 220   | 52.4%   |
| Slightly                         | 104   | 24.8%   |
| Somewhat                         | 72    | 17.1%   |
| Significantly                    | 19    | 4.5%    |
| Unwilling to take my medications | 5     | 1.2%    |
| Total                            | 420   |         |

“What else can I do?”

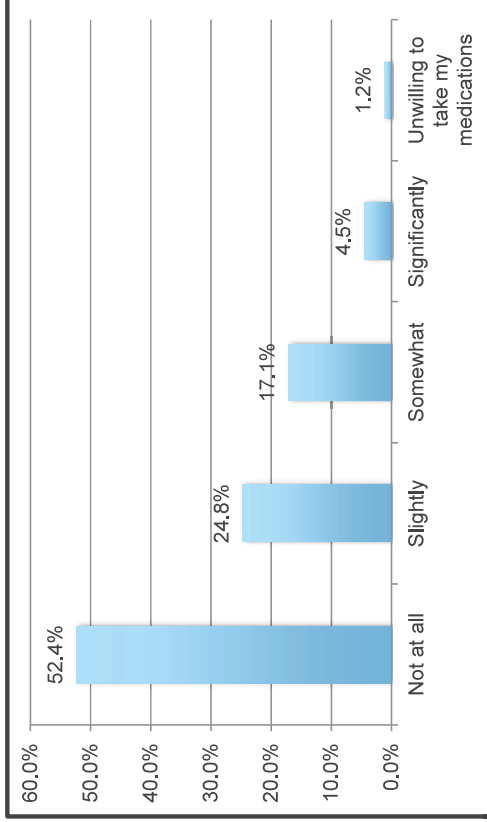

### Q36 How often do you miss or skip taking your medication for HCM?



| Response         | Count | Percent |
|------------------|-------|---------|
| Never            | 231   | 56.8%   |
| Once a month     | 130   | 31.9%   |
| Once a week      | 27    | 6.6%    |
| 2-3 times a week | 15    | 3.7%    |
| 4-5 times a week | 0     | 0.0%    |
| Most days        | 4     | 1.0%    |
| Total            | 407   |         |

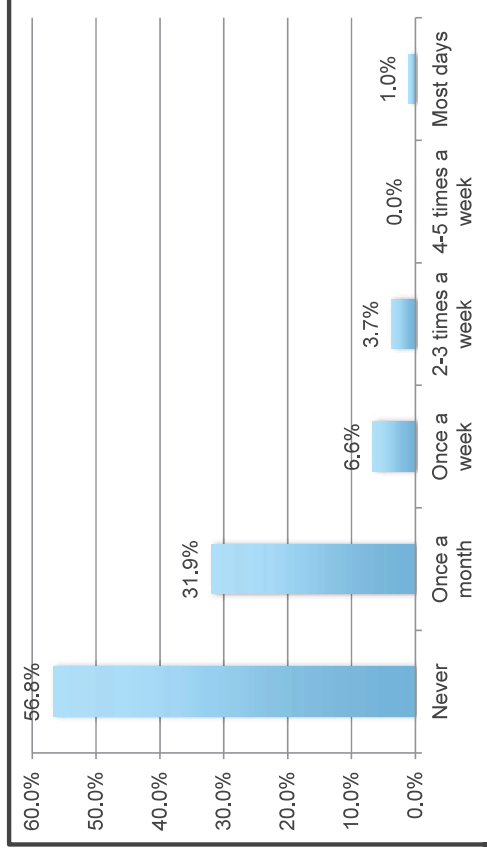

### Q37 Do you have an ICD (Implantable Cardioverter-Defibrillator)?



| Response | Count | Percent |
|----------|-------|---------|
| Yes      | 209   | 47.2%   |
| No       | 234   | 52.8%   |
| Total    | 443   |         |

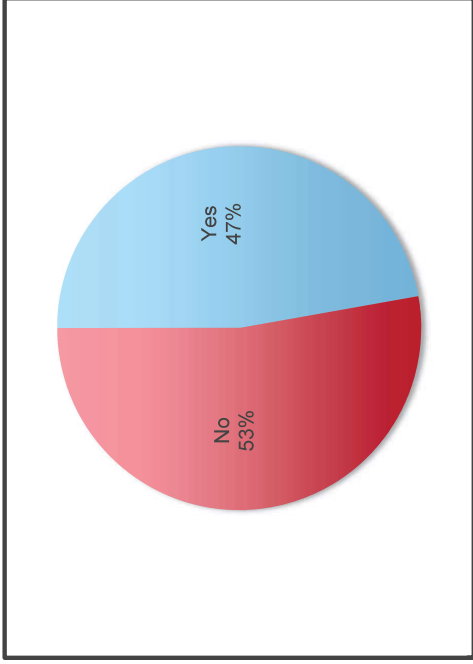

**Q38A NEW: Include only yes responders to "do you have an ICD?" If yes-- how long have you had an ICD?**



| Response                               | Count | Percent |
|----------------------------------------|-------|---------|
| Less than two years                    | 30    | 14.4%   |
| 2 to 5 years                           | 67    | 32.1%   |
| 5 to 10 years                          | 72    | 34.4%   |
| More than 10 years                     | 39    | 18.7%   |
| Total (N): all respondents with an ICD | 209   |         |

**Q39A NEW: Include only yes responders to "do you have an ICD?" If yes-- how many different ICDs have you had?**



| Response                               | Count | Percent |
|----------------------------------------|-------|---------|
| One                                    | 116   | 55.5%   |
| Two                                    | 54    | 25.8%   |
| Three or more                          | 37    | 17.7%   |
| Total (N): all respondents with an ICD | 209   |         |



**Q40A NEW: Include only yes responders to "do you have an ICD?" If yes-- how often have you received an appropriate discharge (shock) from your ICD?**



| Response                               | Count | Percent |
|----------------------------------------|-------|---------|
| Never                                  | 156   | 74.6%   |
| I have had less than 2 shocks          | 34    | 16.3%   |
| I have between 3 and 6 shocks          | 8     | 3.8%    |
| I have had over 7 shocks               | 9     | 4.3%    |
| Total (N): all respondents with an ICD | 209   |         |

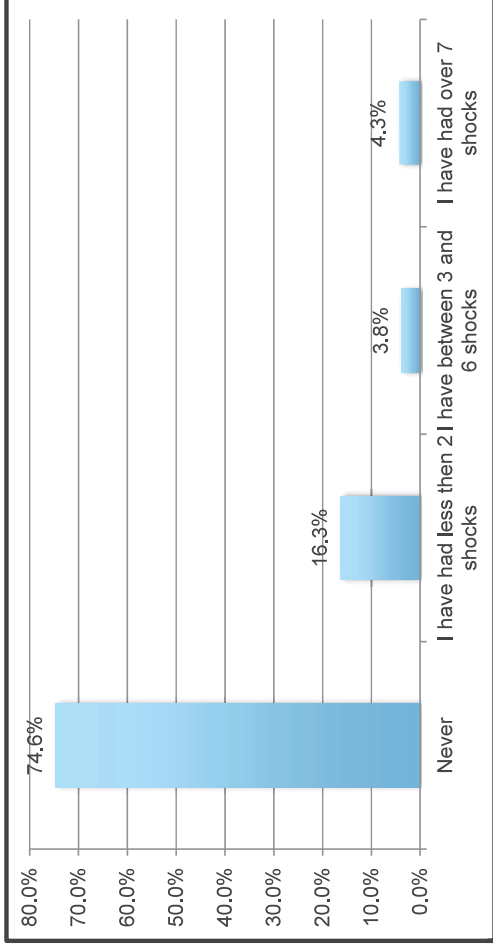

**Q41A NEW: Include only yes responders to "do you have an ICD?" If yes-- how often have you received an inappropriate or non-therapeutic discharge (shock) from your ICD (for instance-- due to lead problems-- incorrect settings-- or other reason)?**

| Response                               | Count | Percent |
|----------------------------------------|-------|---------|
| Never                                  | 155   | 74.2%   |
| Rarely                                 | 22    | 10.5%   |
| Occasionally                           | 5     | 2.4%    |
| Often                                  | 1     | 0.5%    |
| Total (N): all respondents with an ICD | 209   |         |

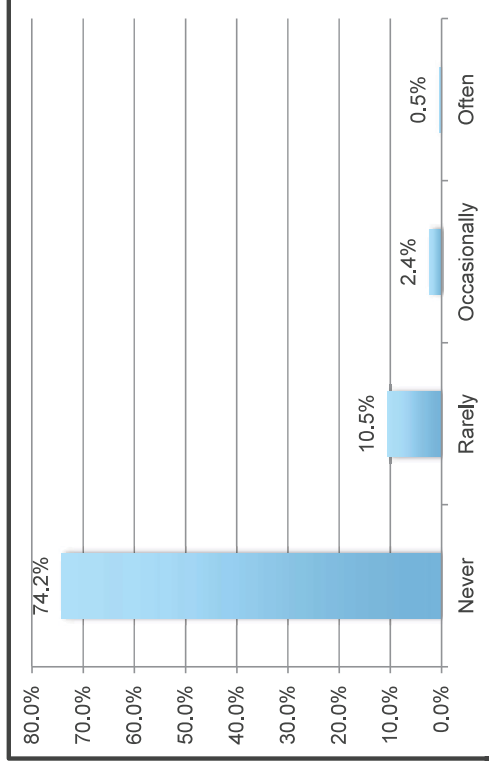

**Q42 Have you ever been told that you are a candidate for a septal reduction procedure-- to reduce obstruction ( myectomy or alcohol ablation)?**



| Response | Count | Percent |
|----------|-------|---------|
| Yes      | 226   | 50.9%   |
| No       | 218   | 49.1%   |
| Total    | 444   |         |

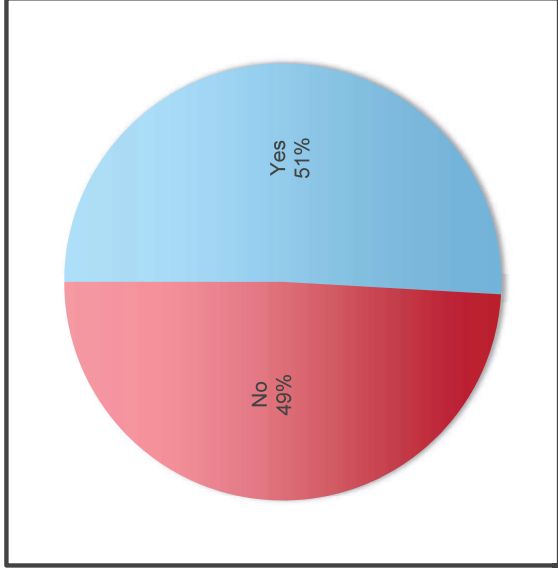

**Q43A NEW: Include only yes responders to "have you been told you are a candidate" If yes-- have you had a procedure to reduce obstruction?**

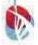

| Response                                                                                            | Count | Percent |
|-----------------------------------------------------------------------------------------------------|-------|---------|
| Yes                                                                                                 | 167   | 73.9%   |
| No                                                                                                  | 59    | 26.1%   |
| Total (N): all responders to "yes I have been told I am a candidate for septal reduction procedure" |       | 226     |

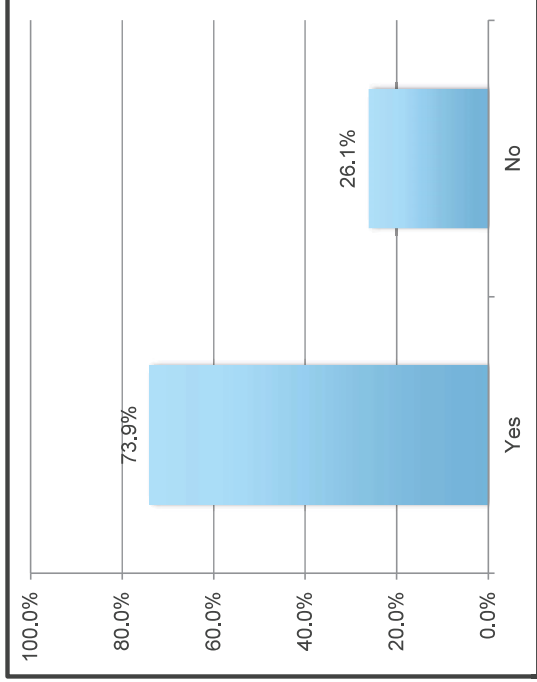

### Q44 Have you had a surgical myectomy to reduce obstruction?



| Response | Count | Percent |
|----------|-------|---------|
| Yes      | 159   | 36.9%   |
| No       | 272   | 63.1%   |
| Total    | 431   |         |

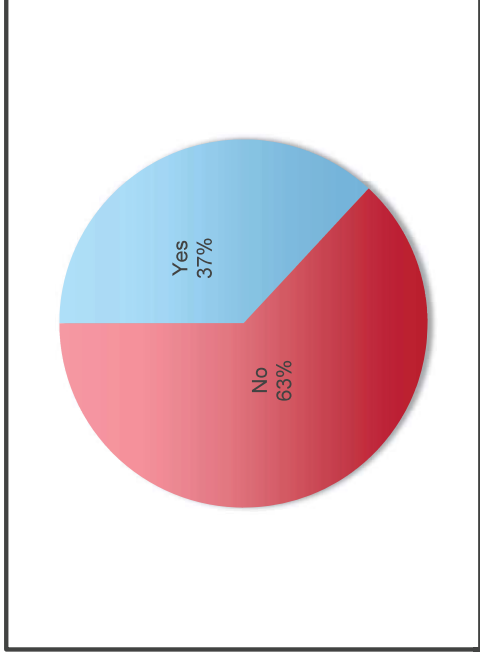

**Q44A NEW: For those who have had a myectomy, what is NYHA symptom class?**



| Response       | Count | Percent |
|----------------|-------|---------|
| NYHA Class I   | 18    | 11.5%   |
| NYHA Class II  | 70    | 44.6%   |
| NYHA Class III | 60    | 38.2%   |
| NYHA Class IV  | 9     | 5.7%    |
| Total          | 157   |         |

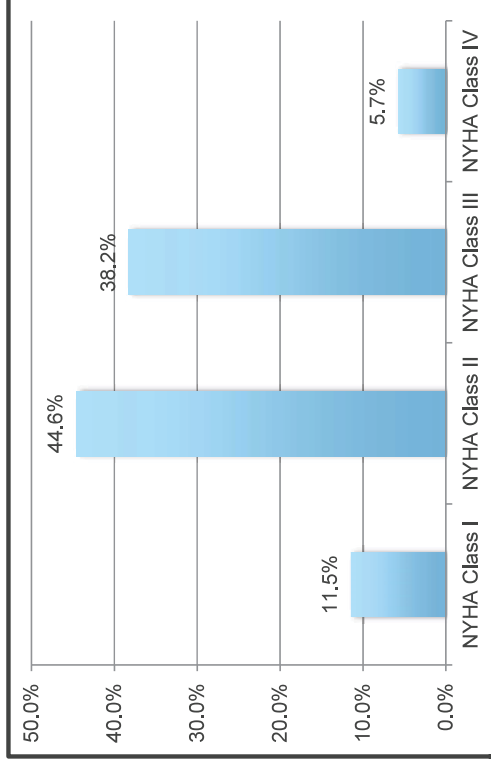

### Q45 When was the myectomy performed?



| Response               | Count | Percent |
|------------------------|-------|---------|
| Within that last year  | 28    | 17.7%   |
| 2 to 5 years ago       | 59    | 37.3%   |
| 5 to 10 years ago      | 48    | 30.4%   |
| 10 to 20 years ago     | 22    | 13.9%   |
| More than 20 years ago | 1     | 0.6%    |
| Total                  | 158   |         |

## Q46 Have you had alcohol septal ablation to reduce obstruction?



| Response | Count | Percent |
|----------|-------|---------|
| Yes      | 31    | 7.1%    |
| No       | 406   | 92.9%   |
| Total    | 437   |         |



**Q47A NEW - Include only responders who said yes to ASA If yes-- how many times have you had alcohol septal ablation?**



| Response           | Count | Percent |
|--------------------|-------|---------|
| Once               | 27    | 90.0%   |
| Twice              | 2     | 6.7%    |
| Three times        | 0     | 0.0%    |
| Four or more times | 1     | 3.3%    |
| Total              | 30    |         |

**Q48A NEW - Include only responders who said yes to ASA When was the most recent alcohol ablation performed?**



| Response               | Count | Percent |
|------------------------|-------|---------|
| Within that last year  | 5     | 16.7%   |
| 2 to 5 years ago       | 8     | 26.7%   |
| 5 to 10 years ago      | 9     | 30.0%   |
| 10 to 20 years ago     | 8     | 26.7%   |
| More than 20 years ago | 0     | 0.0%    |
| Total                  | 30    |         |

**Q49 Have you discussed options to reduce your outflow tract gradient (obstruction) -- a myectomy or an alcohol ablation procedure with your doctor-- but declined to have the procedure performed? Pick the best option.**

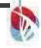

| Response                                                                                                      | Count      | Percent |
|---------------------------------------------------------------------------------------------------------------|------------|---------|
| No - did not discuss                                                                                          | 214        | 62.8%   |
| Yes-- I have discussed one or both however at this time I am attempting to manage my symptoms with medication | 76         | 22.3%   |
| Yes - discussed and declined alcohol ablation                                                                 | 35         | 10.3%   |
| Yes - discussed and declined myectomy                                                                         | 11         | 3.2%    |
| Yes - discussed and declined both myectomy and alcohol ablation                                               | 5          | 1.5%    |
| <b>Total</b>                                                                                                  | <b>341</b> |         |

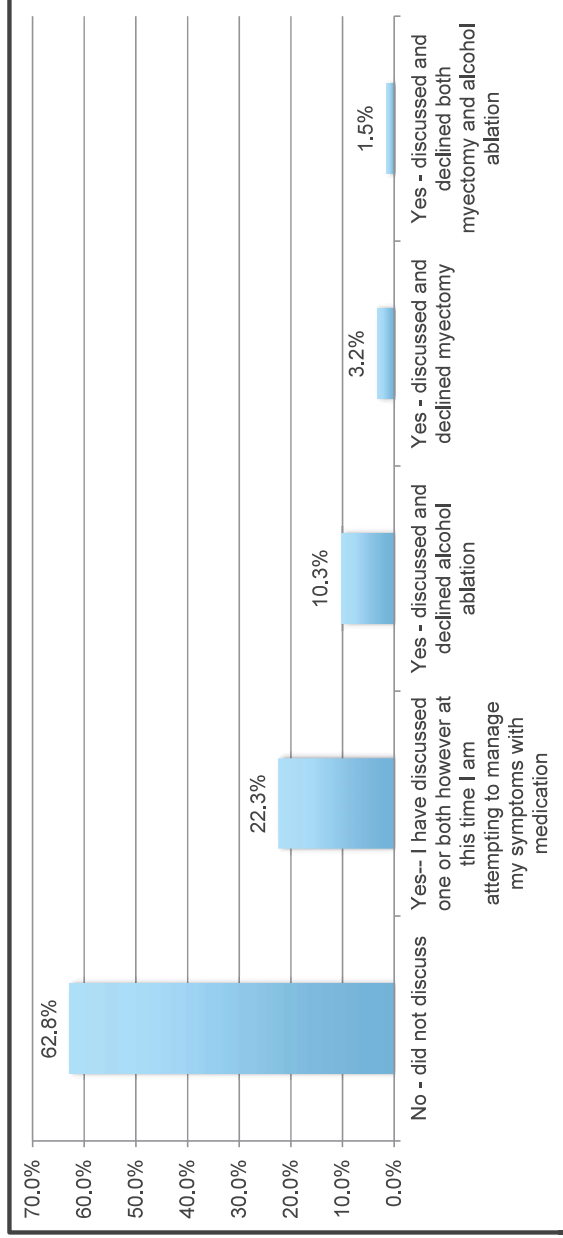

**Q49A NEW: Include only respondents who have ever been told they are a candidate for septal reduction procedure (myectomy or ASA) Have you discussed options to reduce your outflow tract gradient (obstruction) -- a myectomy or an alcohol ablation procedure with your doctor-- but declined to have the procedure performed? Pick the best option.**

| Response                                                                                                      | Count | Percent |
|---------------------------------------------------------------------------------------------------------------|-------|---------|
| No - did not discuss                                                                                          | 53    | 38.1%   |
| Yes-- I have discussed one or both however at this time I am attempting to manage my symptoms with medication | 39    | 28.1%   |
| Yes - discussed and declined alcohol ablation                                                                 | 33    | 23.7%   |
| Yes - discussed and declined myectomy                                                                         | 11    | 7.9%    |
| Yes - discussed and declined both myectomy and alcohol ablation                                               | 3     | 2.2%    |
| Total                                                                                                         | 139   |         |

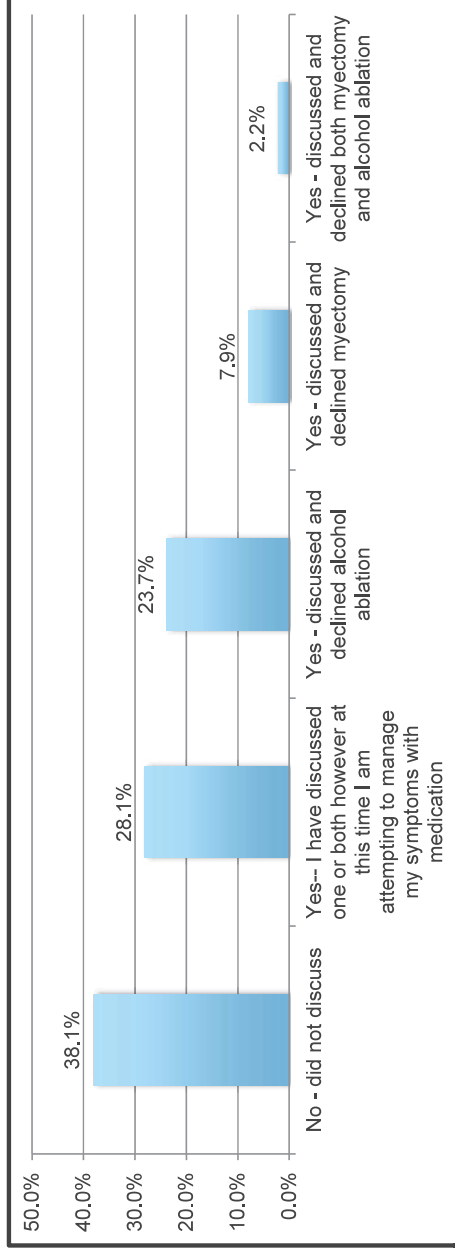

**Q50A NEW: Include only responders who discussed and declined If you declined a procedure-- for what reasons? (Check all that apply)**



| Response                                     | Count | Percent |
|----------------------------------------------|-------|---------|
| Concerned about effectiveness                | 37    | 29.1%   |
| Other                                        | 32    | 25.2%   |
| Concerned about safety                       | 29    | 22.8%   |
| Concerned about side effects                 | 27    | 21.3%   |
| Fear about invasive procedure                | 22    | 17.3%   |
| Cost is too great                            | 9     | 7.1%    |
| Insurance barriers                           | 6     | 4.7%    |
| Total (N): candidates who declined procedure | 127   |         |

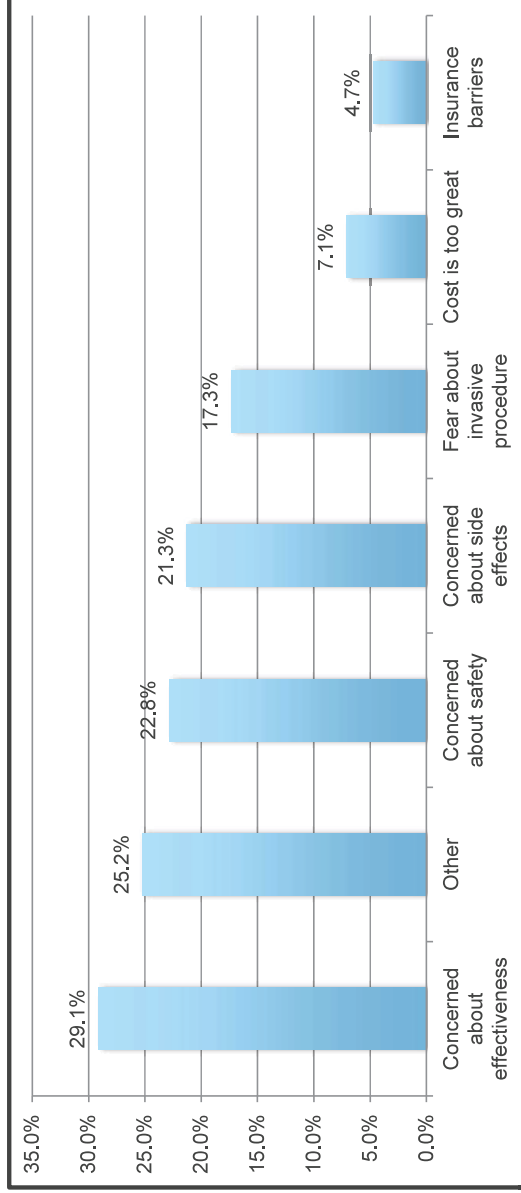

## Q51 Have you had a heart transplant?



| Response | Count | Percent |
|----------|-------|---------|
| Yes      | 5     | 1.1%    |
| No       | 434   | 98.9%   |
| Total    | 439   |         |

**Q52 How many times over your lifetime have you visited the emergency department or been admitted to the hospital due to cardiac symptoms?**



| Response          | Count | Percent |
|-------------------|-------|---------|
| None              | 150   | 33.9%   |
| Once              | 86    | 19.4%   |
| Twice             | 63    | 14.2%   |
| Three times       | 48    | 10.8%   |
| Four times        | 21    | 4.7%    |
| Five times        | 24    | 5.4%    |
| Six or more times | 51    | 11.5%   |
| Total             | 443   |         |

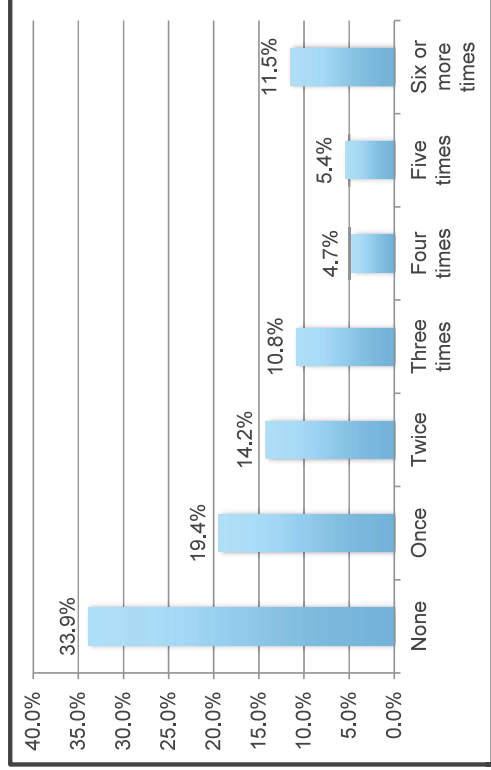

**Q52A NEW segment by time since diagnosis** How many times over your lifetime have you visited the emergency department or been admitted to the hospital due to cardiac symptoms?

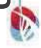

| Response          | All patients |         | Less than 5 years |         | 5 to less than 10 years |         | 10 to less than 20 years |         | 20 to less than 30 years |         | 30 or more years |         |
|-------------------|--------------|---------|-------------------|---------|-------------------------|---------|--------------------------|---------|--------------------------|---------|------------------|---------|
|                   | Count        | Percent | Count             | Percent | Count                   | Percent | Count                    | Percent | Count                    | Percent | Count            | Percent |
| None              | 150          | 33.9%   | 46                | 41.4%   | 48                      | 36.1%   | 39                       | 33.6%   | 11                       | 19.3%   | 5                | 21.7%   |
| Once              | 86           | 19.4%   | 24                | 21.6%   | 25                      | 18.8%   | 24                       | 20.7%   | 9                        | 15.8%   | 4                | 17.4%   |
| Twice             | 63           | 14.2%   | 15                | 13.5%   | 20                      | 15.0%   | 15                       | 12.9%   | 12                       | 21.1%   | 1                | 4.3%    |
| Three times       | 48           | 10.8%   | 12                | 10.8%   | 15                      | 11.3%   | 9                        | 7.8%    | 7                        | 12.3%   | 4                | 17.4%   |
| Four times        | 21           | 4.7%    | 3                 | 2.7%    | 8                       | 6.0%    | 3                        | 2.6%    | 4                        | 7.0%    | 3                | 13.0%   |
| Five times        | 24           | 5.4%    | 6                 | 5.4%    | 7                       | 5.3%    | 5                        | 4.3%    | 4                        | 7.0%    | 2                | 8.7%    |
| Six or more times | 51           | 11.5%   | 5                 | 4.5%    | 10                      | 7.5%    | 21                       | 18.1%   | 10                       | 17.5%   | 4                | 17.4%   |
| Total             | 443          |         | 111               |         | 133                     |         | 116                      |         | 57                       |         | 23               |         |

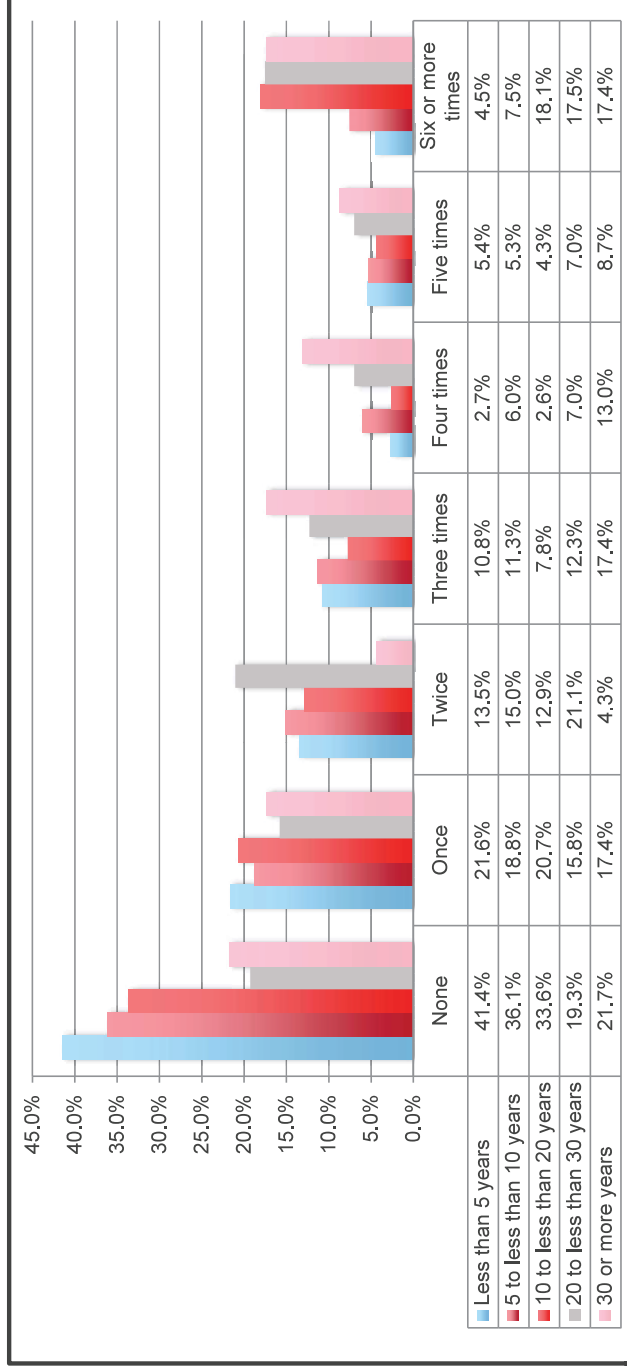



**Q52B NEW segment by time since diagnosis** How many times over your lifetime have you visited the emergency department or been admitted to the hospital due to cardiac symptoms?

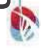

| Time to Diagnosis        | None  |         | Once  |         | Twice |         | Three times |         | Four times |         | Five times |         | Six or more times |         |
|--------------------------|-------|---------|-------|---------|-------|---------|-------------|---------|------------|---------|------------|---------|-------------------|---------|
|                          | Count | Percent | Count | Percent | Count | Percent | Count       | Percent | Count      | Percent | Count      | Percent | Count             | Percent |
| Less than 5 years        | 46    | 30.9%   | 24    | 27.9%   | 15    | 23.8%   | 12          | 25.5%   | 3          | 14.3%   | 6          | 25.0%   | 5                 | 10.0%   |
| 5 to less than 10 years  | 48    | 32.2%   | 25    | 29.1%   | 20    | 31.7%   | 15          | 31.9%   | 8          | 38.1%   | 7          | 29.2%   | 10                | 20.0%   |
| 10 to less than 20 years | 39    | 26.2%   | 24    | 27.9%   | 15    | 23.8%   | 9           | 19.1%   | 3          | 14.3%   | 5          | 20.8%   | 21                | 42.0%   |
| 20 to less than 30 years | 11    | 7.4%    | 9     | 10.5%   | 12    | 19.0%   | 7           | 14.9%   | 4          | 19.0%   | 4          | 16.7%   | 10                | 20.0%   |
| 30 or more years         | 5     | 3.4%    | 4     | 4.7%    | 1     | 1.6%    | 4           | 8.5%    | 3          | 14.3%   | 2          | 8.3%    | 4                 | 8.0%    |
| Total                    | 149   |         | 86    |         | 63    |         | 47          |         | 21         |         | 24         |         | 50                |         |

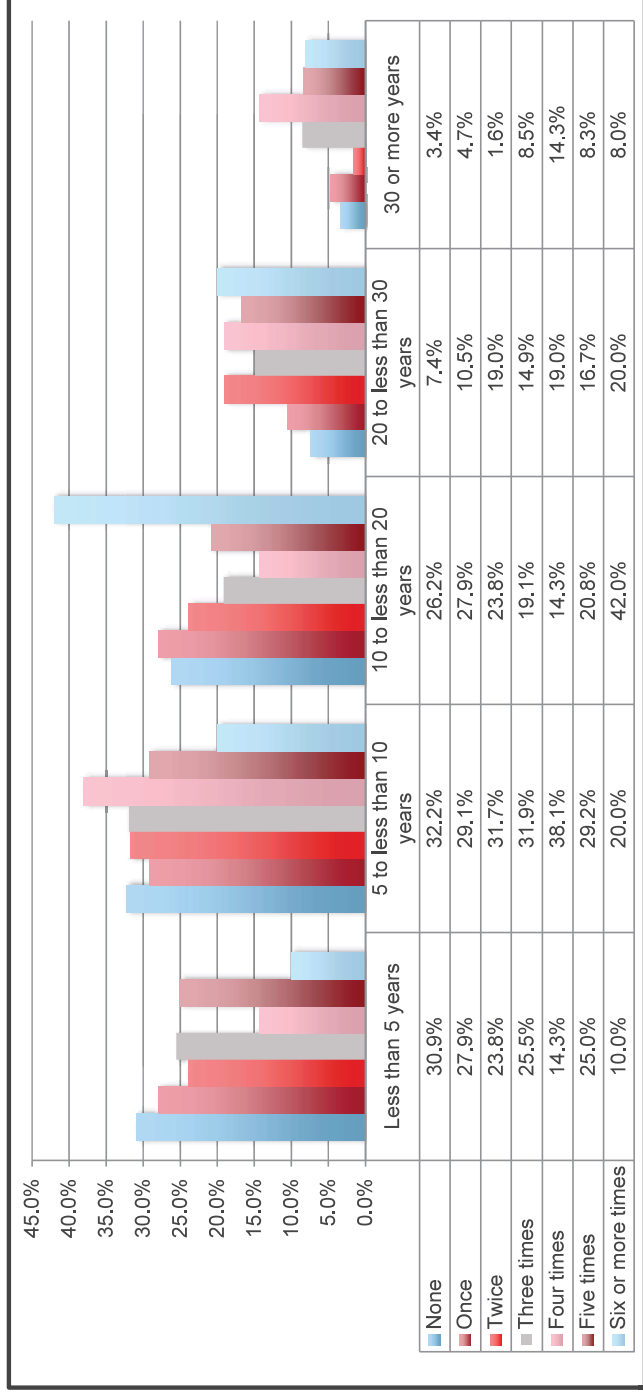

**Q52C NEW Segment by obstruction** How many times over your lifetime have you visited the emergency department or been admitted to the hospital due to cardiac symptoms?

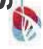

| Response          | All patients |         | Obstructive |         | Non-obstructive |         |
|-------------------|--------------|---------|-------------|---------|-----------------|---------|
|                   | Count        | Percent | Count       | Percent | Count           | Percent |
| None              | 150          | 33.9%   | 70          | 27.3%   | 64              | 43.8%   |
| Once              | 86           | 19.4%   | 50          | 19.5%   | 28              | 19.2%   |
| Twice             | 63           | 14.2%   | 39          | 15.2%   | 18              | 12.3%   |
| Three times       | 48           | 10.8%   | 34          | 13.3%   | 10              | 6.8%    |
| Four times        | 21           | 4.7%    | 14          | 5.5%    | 5               | 3.4%    |
| Five times        | 24           | 5.4%    | 16          | 6.3%    | 6               | 4.1%    |
| Six or more times | 51           | 11.5%   | 33          | 12.9%   | 15              | 10.3%   |
| Total             | 443          |         | 256         |         | 146             |         |

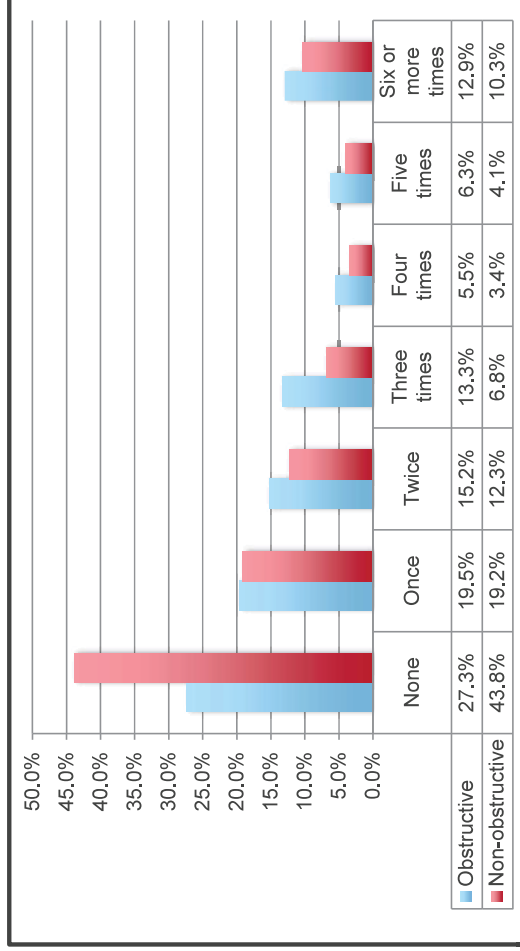

### Q53 How many years has it been since your diagnosis of HCM?



| Response                 | Count | Percent |
|--------------------------|-------|---------|
| Less than 5 years        | 111   | 25.2%   |
| 5 to less than 10 years  | 134   | 30.4%   |
| 10 to less than 20 years | 116   | 26.3%   |
| 20 to less than 30 years | 57    | 12.9%   |
| 30 or more years         | 23    | 5.2%    |
| Total                    | 441   |         |

## Q54 Have your symptoms increased or interfered with your life since your original diagnosis?



| Response               | Count | Percent |
|------------------------|-------|---------|
| Not at all             | 65    | 14.7%   |
| Slightly               | 107   | 24.3%   |
| Somewhat               | 138   | 31.3%   |
| Significantly worsened | 131   | 29.7%   |
| Total                  | 441   |         |

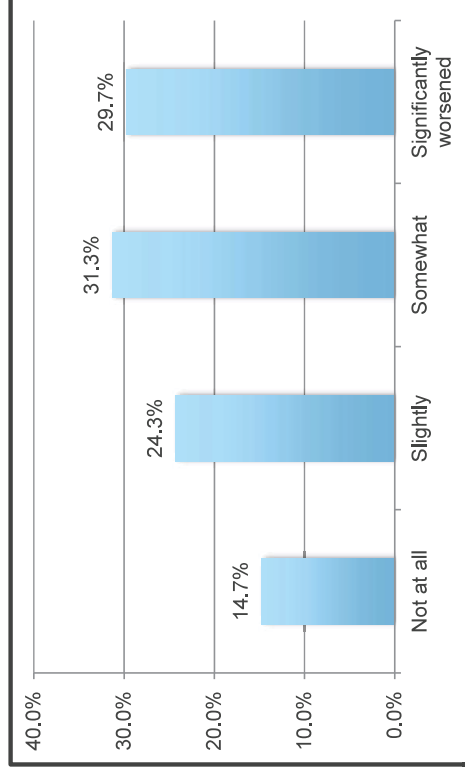

**Q55 In the past 4 weeks-- please rate your physical quality of life:**



| Response  | Count | Percent |
|-----------|-------|---------|
| Poor      | 20    | 4.5%    |
| Fair      | 93    | 21.1%   |
| Good      | 156   | 35.5%   |
| Very good | 119   | 27.0%   |
| Excellent | 52    | 11.8%   |
| Total     | 440   |         |

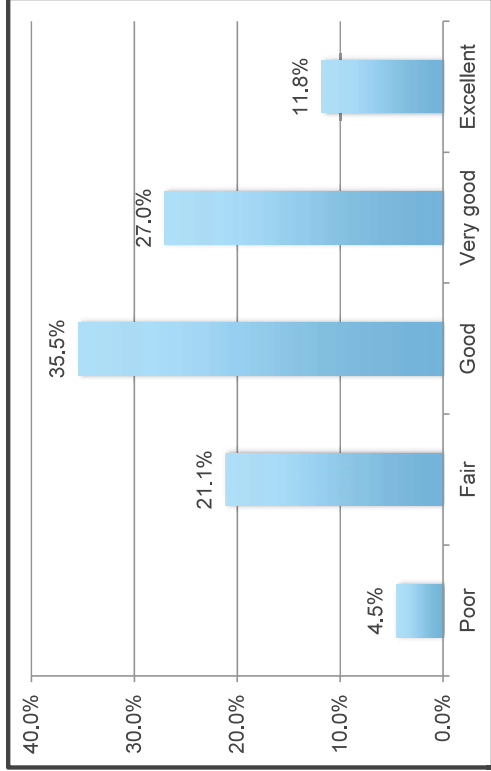

**Q55A NEW: Segment based on patient origination In the past 4 weeks-- please rate your physical quality of life:**



| Response  | All Patients |         | Symptoms |         | Unrelated Med Investig. |         | Screening |         |
|-----------|--------------|---------|----------|---------|-------------------------|---------|-----------|---------|
|           | Count        | Percent | Count    | Percent | Count                   | Percent | Count     | Percent |
| Poor      | 20           | 4.5%    | 15       | 6.4%    | 4                       | 2.9%    | 1         | 1.5%    |
| Fair      | 93           | 21.1%   | 66       | 28.0%   | 15                      | 10.9%   | 12        | 17.9%   |
| Good      | 156          | 35.5%   | 93       | 39.4%   | 42                      | 30.7%   | 21        | 31.3%   |
| Very good | 119          | 27.0%   | 44       | 18.6%   | 55                      | 40.1%   | 20        | 29.9%   |
| Excellent | 52           | 11.8%   | 18       | 7.6%    | 21                      | 15.3%   | 13        | 19.4%   |
| Total     | 440          |         | 236      |         | 137                     |         | 67        |         |

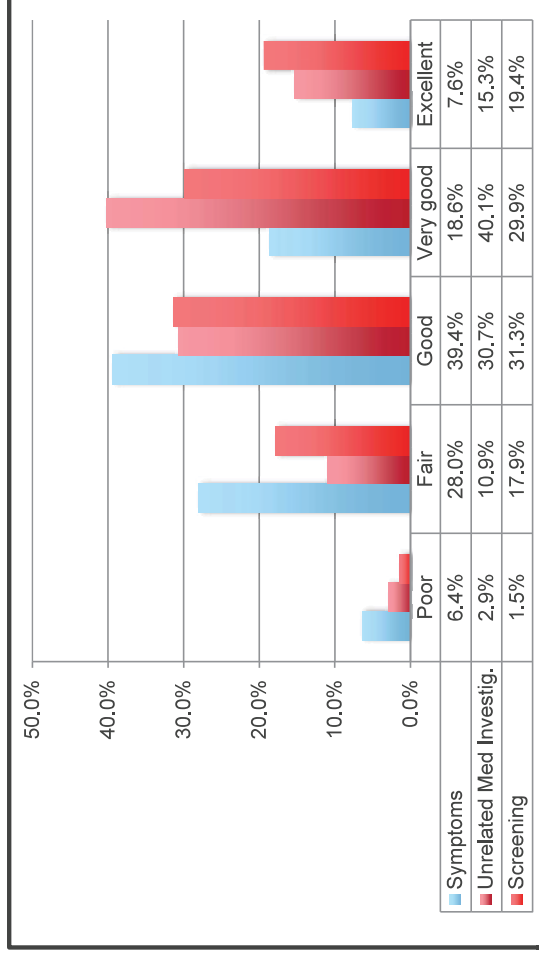

**Q55B NEW: Segment based on NYHA symptoms In the past 4 weeks-- please rate your physical quality of life:**



| Response  | All Patients |         | NYHA Class I |         | NYHA Class II |         | NYHA Class III |         | NYHA Class IV |         |
|-----------|--------------|---------|--------------|---------|---------------|---------|----------------|---------|---------------|---------|
|           | Count        | Percent | Count        | Percent | Count         | Percent | Count          | Percent | Count         | Percent |
| Poor      | 20           | 4.5%    | 0            | 0.0%    | 2             | 1.1%    | 8              | 6.0%    | 9             | 37.5%   |
| Fair      | 93           | 21.1%   | 0            | 0.0%    | 31            | 17.0%   | 53             | 39.8%   | 7             | 29.2%   |
| Good      | 156          | 35.5%   | 22           | 24.2%   | 81            | 44.5%   | 46             | 34.6%   | 4             | 16.7%   |
| Very good | 119          | 27.0%   | 34           | 37.4%   | 61            | 33.5%   | 21             | 15.8%   | 1             | 4.2%    |
| Excellent | 52           | 11.8%   | 35           | 38.5%   | 7             | 3.8%    | 5              | 3.8%    | 3             | 12.5%   |
| Total     | 440          |         | 91           |         | 182           |         | 133            |         | 24            |         |

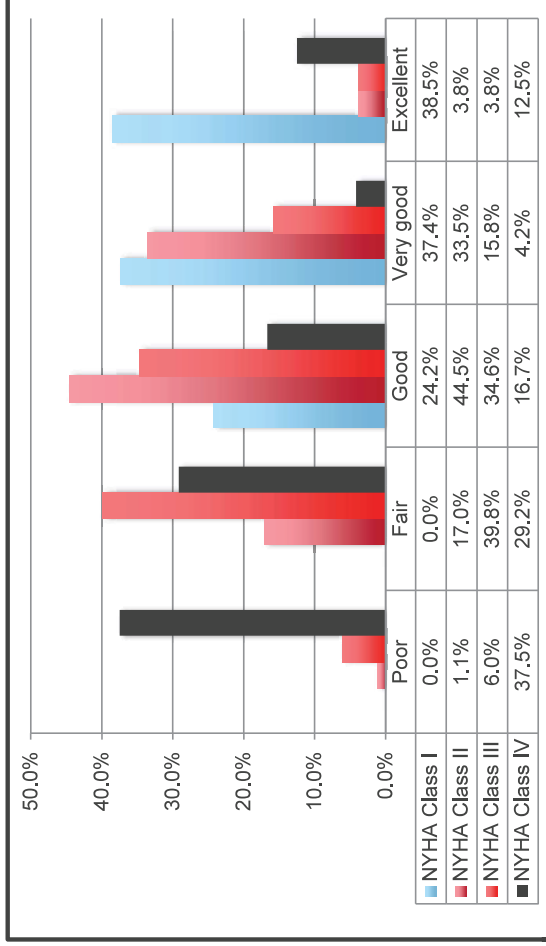

**Q55C NEW: Segment based on obstruction** In the past 4 weeks-- please rate your physical quality of life:



| Response  | All Patients |         | Obstructive |         | Non-obstructive |         |
|-----------|--------------|---------|-------------|---------|-----------------|---------|
|           | Count        | Percent | Count       | Percent | Count           | Percent |
| Poor      | 20           | 4.5%    | 11          | 4.4%    | 6               | 4.1%    |
| Fair      | 93           | 21.1%   | 58          | 23.0%   | 25              | 17.1%   |
| Good      | 156          | 35.5%   | 106         | 42.1%   | 40              | 27.4%   |
| Very good | 119          | 27.0%   | 60          | 23.8%   | 44              | 30.1%   |
| Excellent | 52           | 11.8%   | 17          | 6.7%    | 31              | 21.2%   |
| Total     | 440          |         | 252         |         | 146             |         |

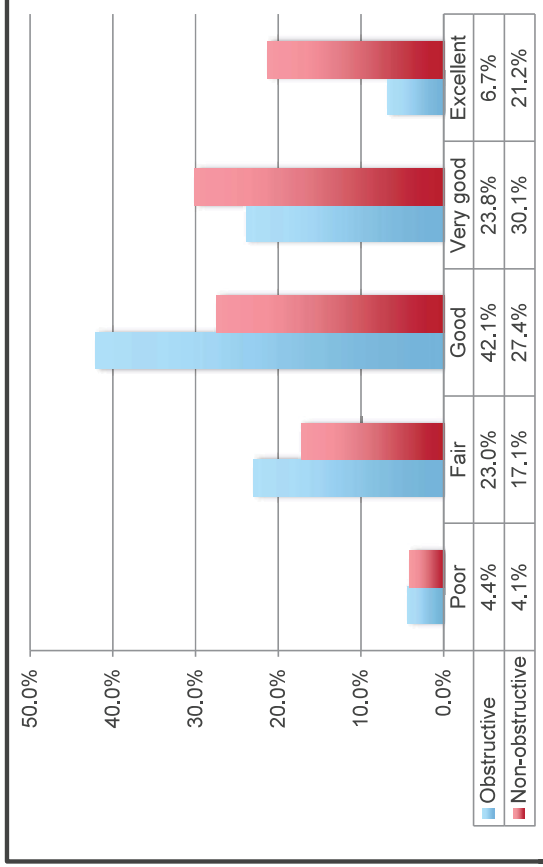



**Q56 In the past 4 weeks-- please rate your emotional quality of life:**



| Response  | Count | Percent |
|-----------|-------|---------|
| Poor      | 26    | 5.9%    |
| Fair      | 77    | 17.4%   |
| Good      | 146   | 33.0%   |
| Very good | 126   | 28.5%   |
| Excellent | 67    | 15.2%   |
| Total     | 442   |         |

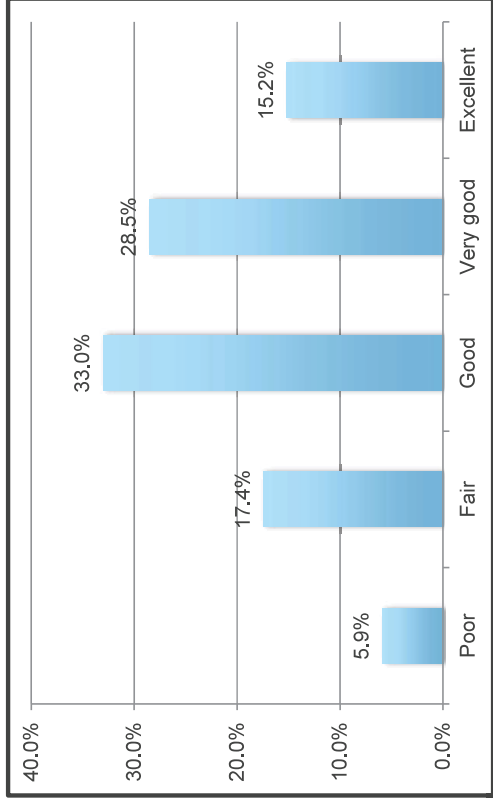

### Q57 To what extent does your HCM affect your work?



| Response       | Count | Percent |
|----------------|-------|---------|
| Not at all     | 145   | 33.1%   |
| Slightly       | 86    | 19.6%   |
| Somewhat       | 74    | 16.9%   |
| Significantly  | 35    | 8.0%    |
| Unable to work | 57    | 13.0%   |
| Other          | 41    | 9.4%    |
| Total          | 438   |         |

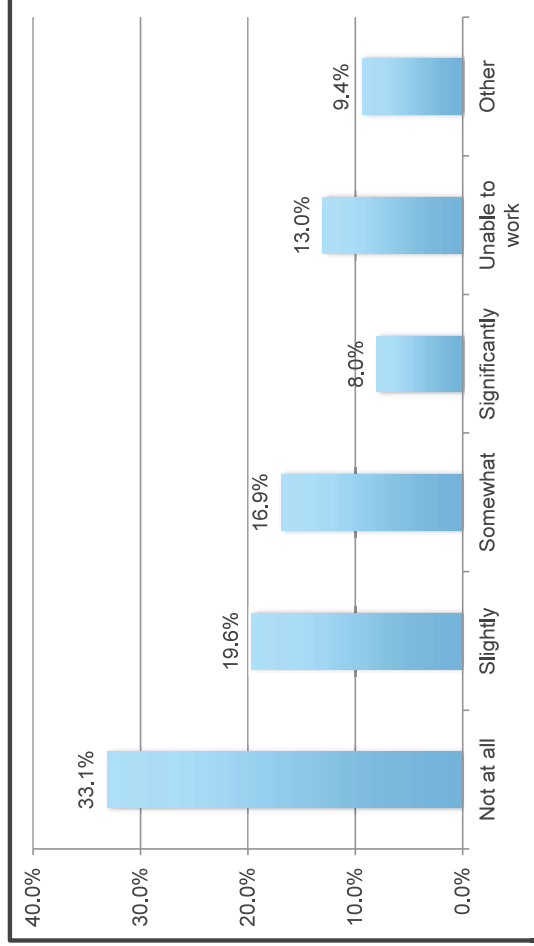

### Q58 To what extent does your HCM affect your social life?



| Response            | Count | Percent |
|---------------------|-------|---------|
| Not at all          | 147   | 33.7%   |
| Slightly            | 107   | 24.5%   |
| Somewhat            | 119   | 27.3%   |
| Significantly       | 61    | 14.0%   |
| Unable to socialize | 2     | 0.5%    |
| Total               | 436   |         |

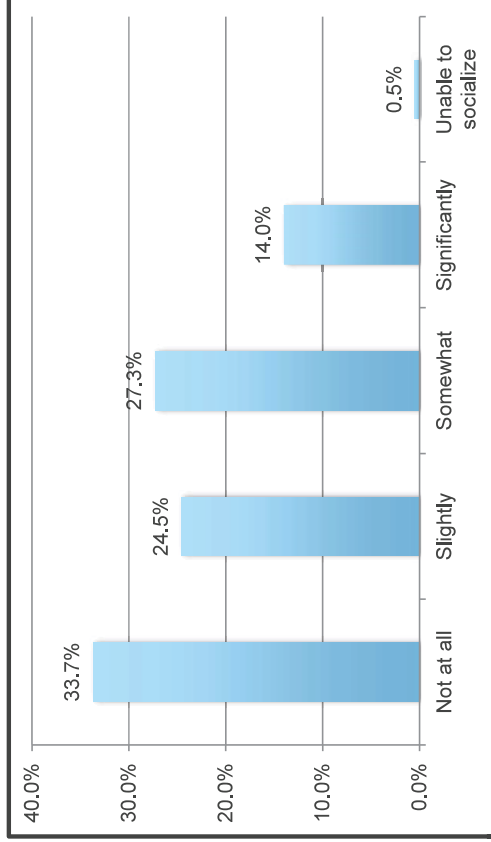

## Q59 To what extent does your HCM affect your ability to exercise?



| Response           | Count | Percent |
|--------------------|-------|---------|
| Not at all         | 49    | 11.2%   |
| Slightly           | 84    | 19.2%   |
| Somewhat           | 124   | 28.4%   |
| Significantly      | 141   | 32.3%   |
| Unable to exercise | 39    | 8.9%    |
| Total              | 437   |         |

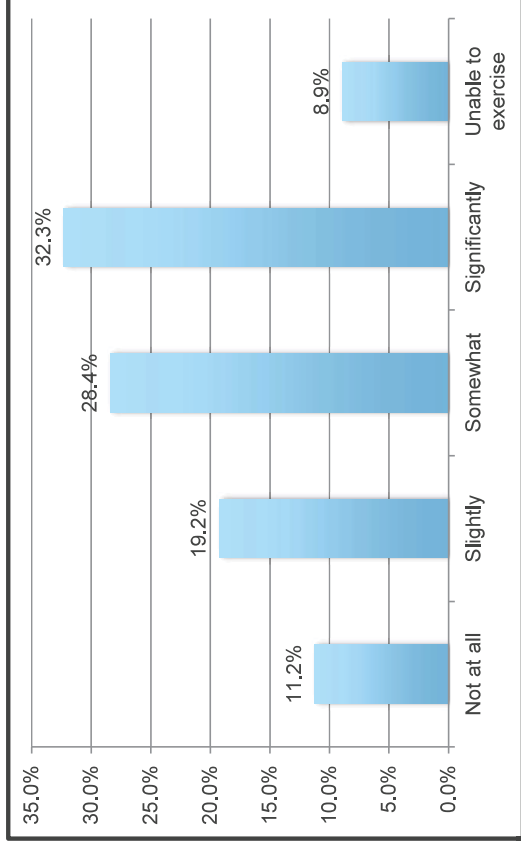

## Q59A **NEW**: Segment by patient origination To what extent does your HCM affect your ability to exercise?



| Response           | All Patients |         | Symptoms |         | Unrelated Med Investigation |         | Screening |         |
|--------------------|--------------|---------|----------|---------|-----------------------------|---------|-----------|---------|
|                    | Count        | Percent | Count    | Percent | Count                       | Percent | Count     | Percent |
| Not at all         | 49           | 11.2%   | 15       | 6.4%    | 19                          | 14.0%   | 15        | 22.7%   |
| Slightly           | 84           | 19.2%   | 34       | 14.5%   | 33                          | 24.3%   | 17        | 25.8%   |
| Somewhat           | 124          | 28.4%   | 69       | 29.4%   | 43                          | 31.6%   | 12        | 18.2%   |
| Significantly      | 141          | 32.3%   | 92       | 39.1%   | 31                          | 22.8%   | 18        | 27.3%   |
| Unable to exercise | 39           | 8.9%    | 25       | 10.6%   | 10                          | 7.4%    | 4         | 6.1%    |
| Total              | 437          |         | 235      |         | 136                         |         | 66        |         |

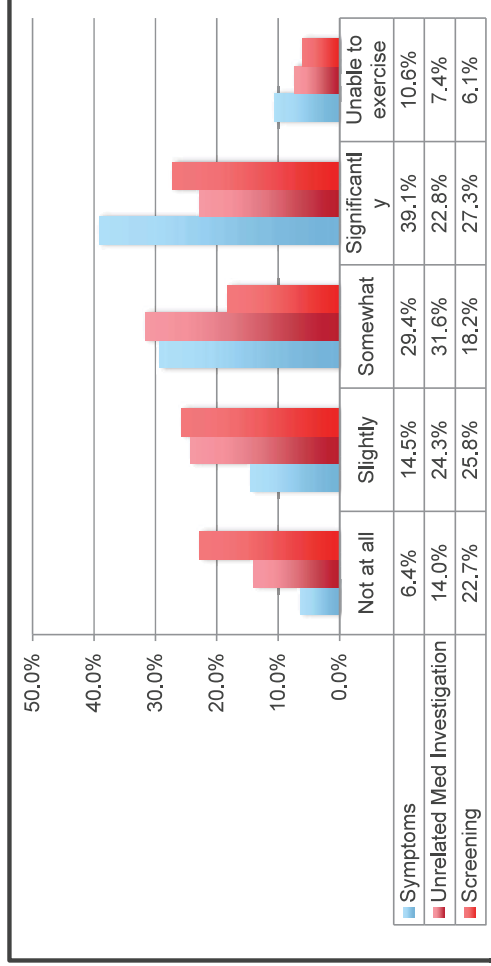

**Q59B NEW: Segment by NYHA Class To what extent does your HCM affect your ability to exercise?**



| Response           | All Patients |         | NYHA Class I |         | NYHA Class II |         | NYHA Class III |         | NYHA Class IV |         |
|--------------------|--------------|---------|--------------|---------|---------------|---------|----------------|---------|---------------|---------|
|                    | Count        | Percent | Count        | Percent | Count         | Percent | Count          | Percent | Count         | Percent |
| Not at all         | 49           | 11.2%   | 30           | 33.3%   | 8             | 4.4%    | 5              | 3.8%    | 3             | 12.5%   |
| Slightly           | 84           | 19.2%   | 32           | 35.6%   | 45            | 24.9%   | 7              | 5.3%    | 0             | 0.0%    |
| Somewhat           | 124          | 28.4%   | 23           | 25.6%   | 75            | 41.4%   | 21             | 15.8%   | 2             | 8.3%    |
| Significantly      | 141          | 32.3%   | 5            | 5.6%    | 49            | 27.1%   | 82             | 61.7%   | 3             | 12.5%   |
| Unable to exercise | 39           | 8.9%    | 0            | 0.0%    | 4             | 2.2%    | 18             | 13.5%   | 16            | 66.7%   |
| Total              | 437          |         | 90           |         | 181           |         | 133            |         | 24            |         |

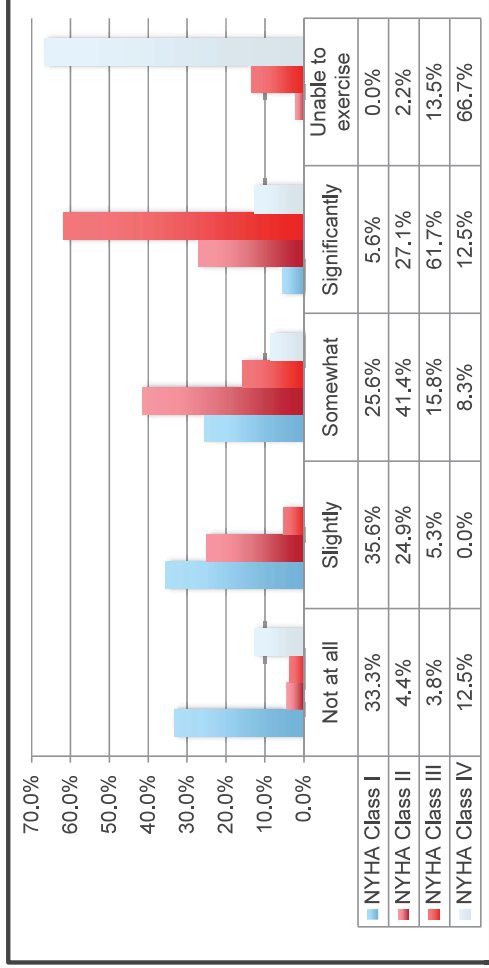

## Q60 To what extent does your HCM affect your ability to travel?



| Response         | Count | Percent |
|------------------|-------|---------|
| Not at all       | 203   | 46.3%   |
| Slightly         | 96    | 21.9%   |
| Somewhat         | 97    | 22.1%   |
| Significantly    | 40    | 9.1%    |
| Unable to travel | 2     | 0.5%    |
| Total            | 438   |         |

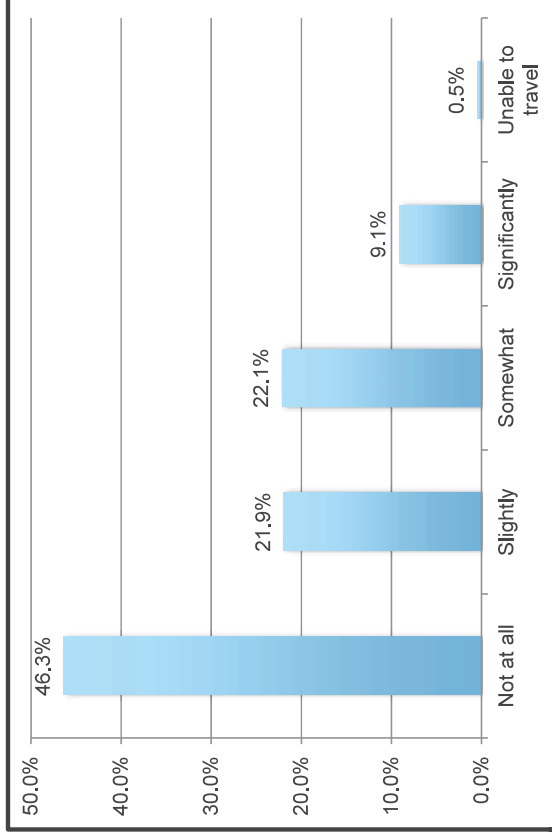

## Q61 To what extent does your HCM affect physical relationships?



| Response                                   | Count | Percent |
|--------------------------------------------|-------|---------|
| Not at all                                 | 195   | 44.8%   |
| Slightly                                   | 98    | 22.5%   |
| Somewhat                                   | 82    | 18.9%   |
| Significantly                              | 51    | 11.7%   |
| Unable to maintain a physical relationship | 9     | 2.1%    |
| Total                                      | 435   |         |

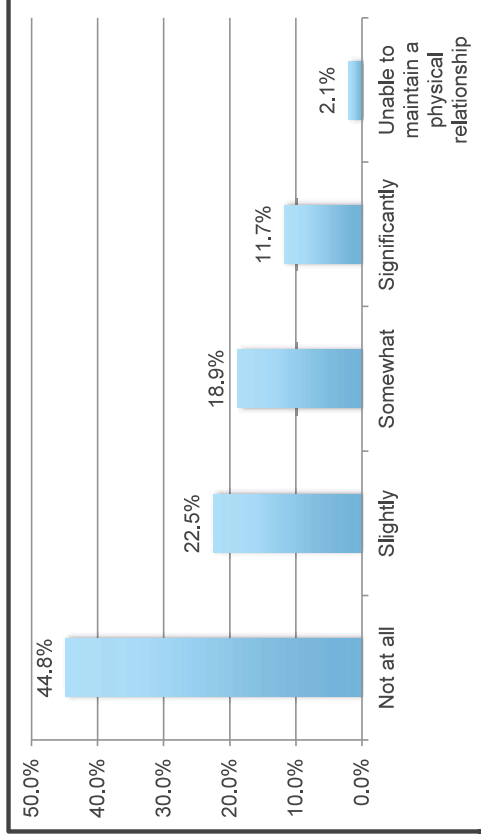



## Q62 How aware is your HCM specialist of the burden of your HCM on your overall quality of life?



| Response                      | Count | Percent |
|-------------------------------|-------|---------|
| Not at all aware              | 53    | 12.5%   |
| Slightly aware                | 58    | 13.6%   |
| Somewhat aware                | 85    | 20.0%   |
| Very aware                    | 146   | 34.4%   |
| I don't see an HCM specialist | 83    | 19.5%   |
| Total                         | 425   |         |

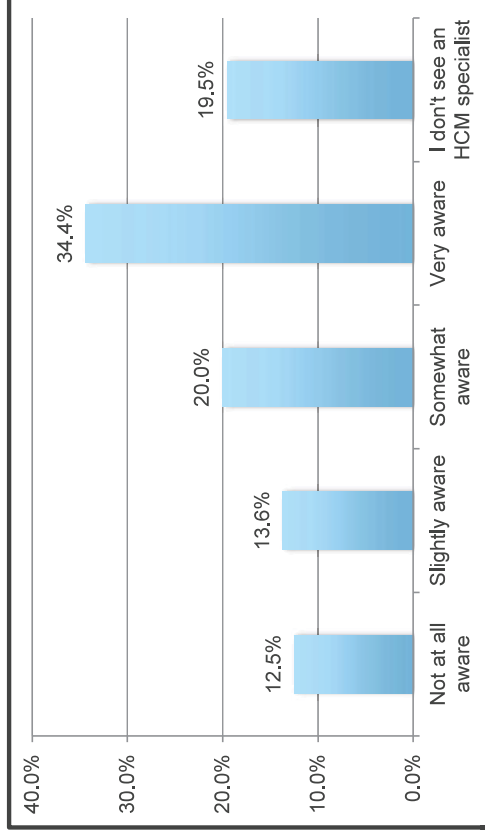

### Q63 How aware is your general cardiologist of the burden of your HCM on your overall quality of life?



| Response                           | Count | Percent |
|------------------------------------|-------|---------|
| Not at all aware                   | 57    | 13.4%   |
| Slightly aware                     | 71    | 16.7%   |
| Somewhat aware                     | 79    | 18.6%   |
| Very aware                         | 127   | 30.0%   |
| I don't see a general cardiologist | 90    | 21.2%   |
| Total                              | 424   |         |

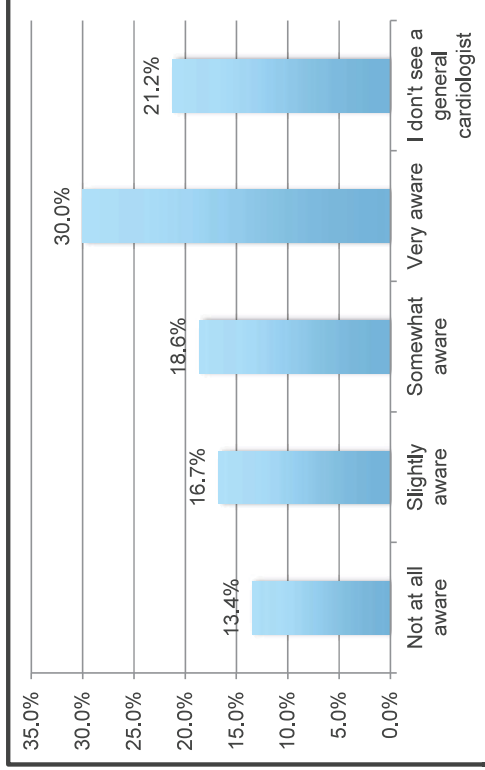

**Q64 Excluding your HCM specialist-- how well do you feel other physicians in your life understand your HCM medical condition?**



| Response        | Count | Percent |
|-----------------|-------|---------|
| Poorly          | 55    | 12.5%   |
| Not that well   | 125   | 28.5%   |
| Average         | 127   | 28.9%   |
| Reasonably well | 94    | 21.4%   |
| Very well       | 38    | 8.7%    |
| Total           | 439   |         |

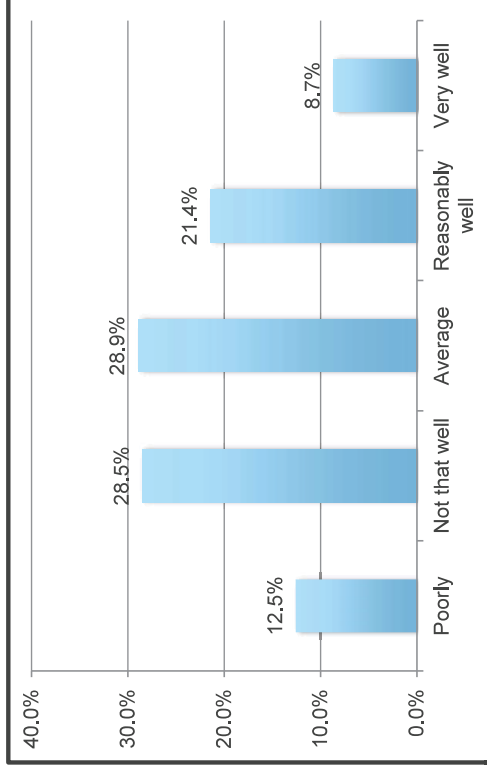

**Q65 Beyond family members-- and excluding social media contacts-- how many people do you personally know with HCM?**

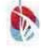

| Response          | Count | Percent |
|-------------------|-------|---------|
| None              | 277   | 63.0%   |
| 1 to 4 people     | 141   | 32.0%   |
| 5 to 9 people     | 17    | 3.9%    |
| 10 or more people | 5     | 1.1%    |
| Total             | 440   |         |

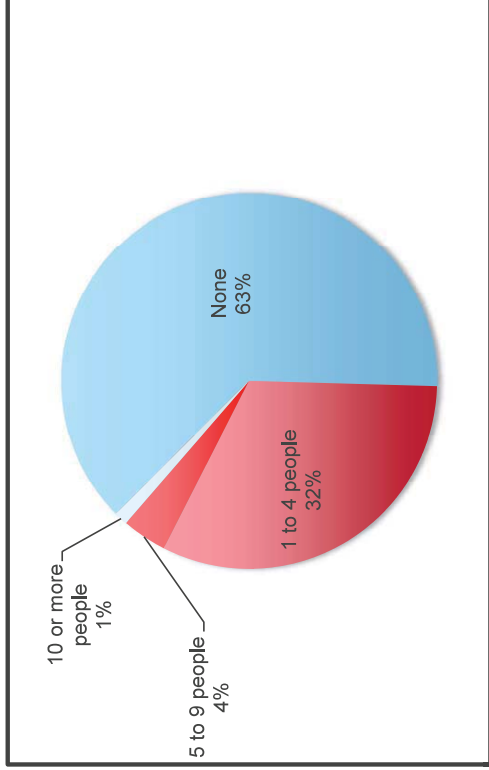

**Q66 How engaged are you with HCM in seeking out information-- discussing concerns with your physician-- talking about HCM with your family-- or participating in patient advocacy?**

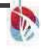

| Response                 | Count | Percent |
|--------------------------|-------|---------|
| No engagement            | 57    | 12.9%   |
| Mildly engaged           | 172   | 38.9%   |
| Moderately engaged       | 119   | 26.9%   |
| Highly engaged           | 76    | 17.2%   |
| Extremely highly engaged | 18    | 4.1%    |
| Total                    | 442   |         |

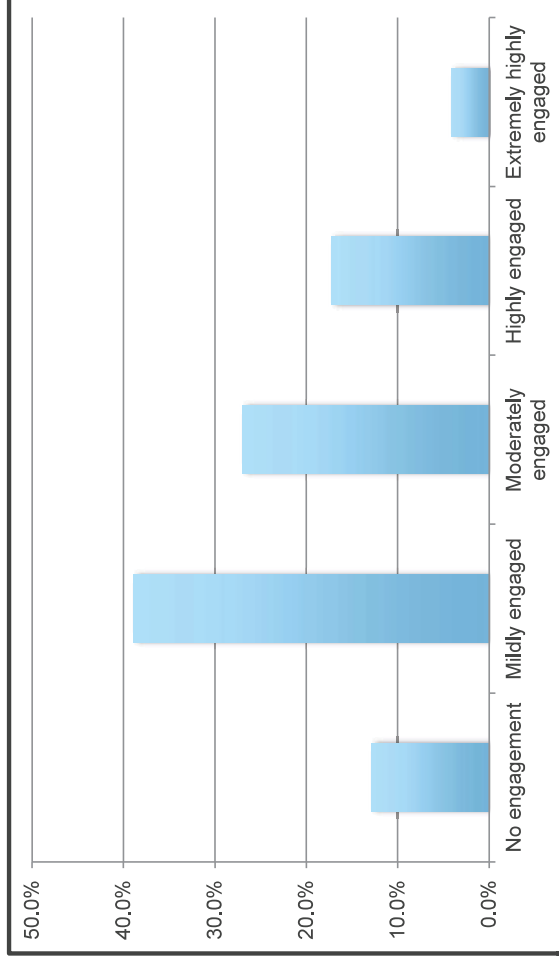

**Q67 What level of education and awareness do you believe you have about HCM including symptoms-- causes-- complications-- tests and treatment options?**



| Response  | Count | Percent |
|-----------|-------|---------|
| Poor      | 13    | 2.9%    |
| Fair      | 54    | 12.2%   |
| Good      | 131   | 29.6%   |
| Very good | 166   | 37.6%   |
| Excellent | 78    | 17.6%   |
| Total     | 442   |         |

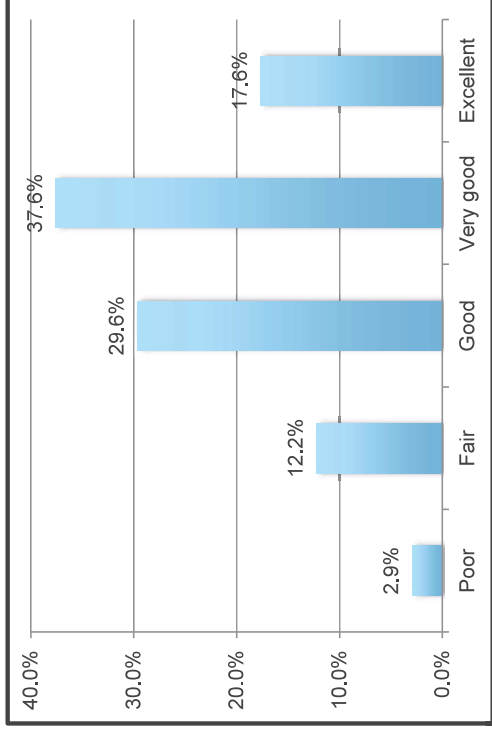

**Q68 Where do you obtain your information about HCM? (Check all that apply)**



| Response                   | Count | Percent |
|----------------------------|-------|---------|
| HCMA                       | 369   | 83.1%   |
| Your HCM physician         | 302   | 68.0%   |
| Other                      | 130   | 29.3%   |
| Local doctor               | 89    | 20.0%   |
| Facebook                   | 61    | 13.7%   |
| Friends with HCM           | 31    | 7.0%    |
| Total (N): all respondents | 444   |         |

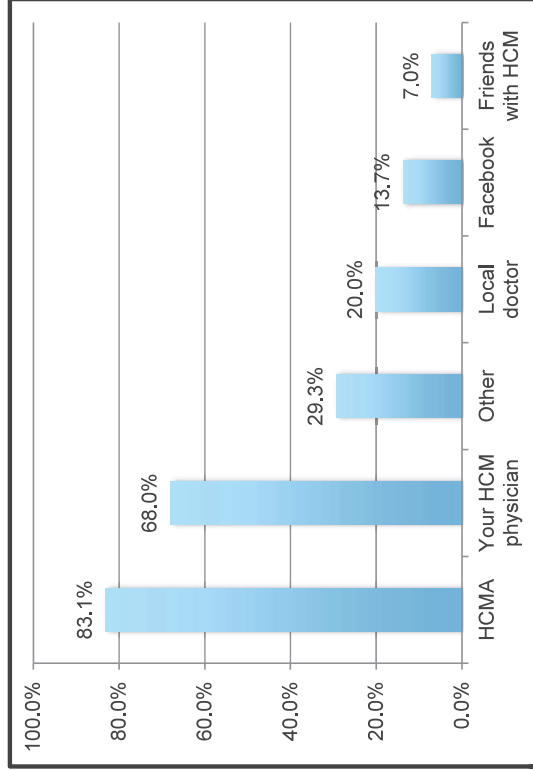

**Q69 Have you ever attended an educational program on HCM? (Check all that apply)**



| Response                                          | Count | Percent |
|---------------------------------------------------|-------|---------|
| Yes-- I have attended an HCMA event               | 108   | 24.3%   |
| Yes-- I have attended an HCM educational program  | 58    | 13.1%   |
| No-- I have not-- nor do I think I would          | 83    | 18.7%   |
| No-- I have not but may be interested in doing so | 218   | 49.1%   |
| Total (N): all respondents                        | 444   |         |

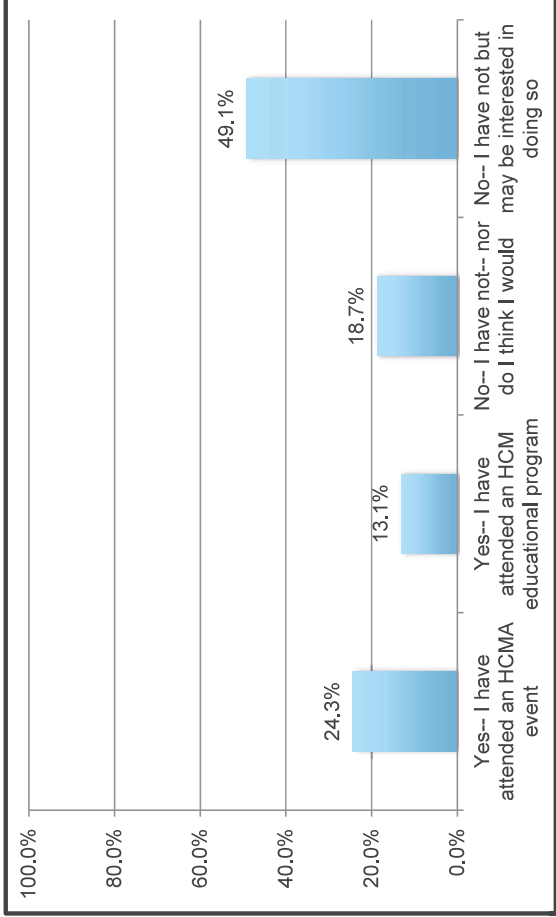



### Q70 Have you ever participated in a clinical trial?



| Response | Count | Percent |
|----------|-------|---------|
| Yes      | 89    | 20.3%   |
| No       | 349   | 79.7%   |
| Total    | 438   |         |

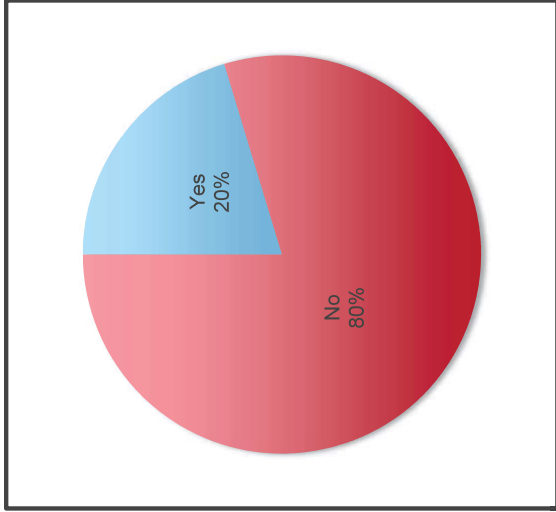

**Q71 If yes-- why did you participate? (Check all that apply)**



| Response                                            | Count | Percent |
|-----------------------------------------------------|-------|---------|
| Desire to help advance medicine/science             | 70    | 78.7%   |
| My physician recommended it                         | 35    | 39.3%   |
| Other                                               | 12    | 13.5%   |
| Financial incentive                                 | 2     | 2.2%    |
| Total (N): all respondents participating in a trial | 89    |         |

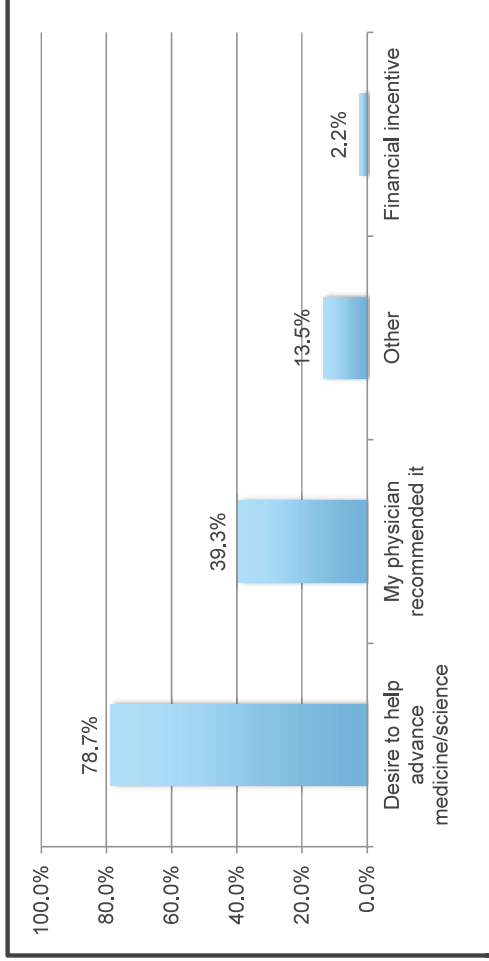

## Q72 Would you consider participating in a clinical trial for a new HCM therapy?



| Response | Count | Percent |
|----------|-------|---------|
| Yes      | 315   | 72.2%   |
| No       | 121   | 27.8%   |
| Total    | 436   |         |

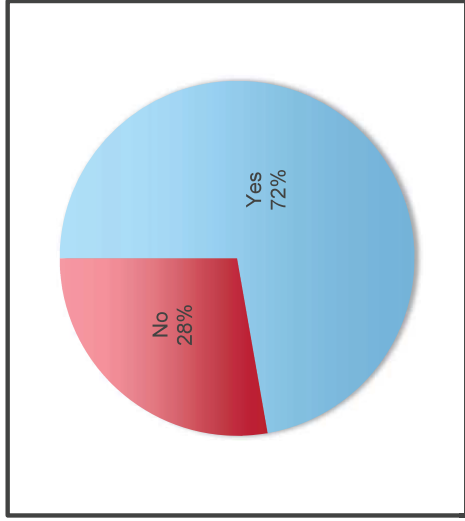

**Q73 You replied that you are not interested in participating in clinical trials-- can you please provide us with your reasons for not being interested? Check all that apply**

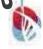

| Response                                                        | Count | Percent |
|-----------------------------------------------------------------|-------|---------|
| Concern about safety or side effects                            | 54    | 44.6%   |
| The benefit to me is not clear or adequate                      | 51    | 42.1%   |
| Other                                                           | 35    | 28.9%   |
| Concern about the distance to travel to the study site          | 27    | 22.3%   |
| Concern about receiving a placebo in the trial                  | 25    | 20.7%   |
| I believe my treatment is better than that being studied        | 19    | 15.7%   |
| I do not have time                                              | 18    | 14.9%   |
| I do not trust companies                                        | 6     | 5.0%    |
| Total (N): all those not interested in participating in a trial | 121   |         |

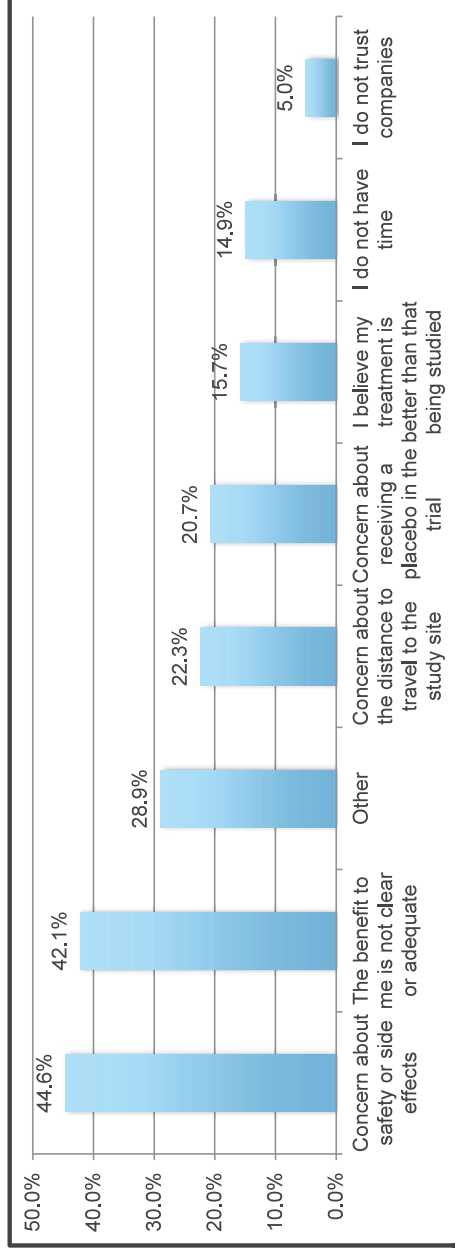

## Q74 What gender are you?



| Response | Count | Percent |
|----------|-------|---------|
| Male     | 227   | 51.8%   |
| Female   | 211   | 48.2%   |
| Total    | 438   |         |

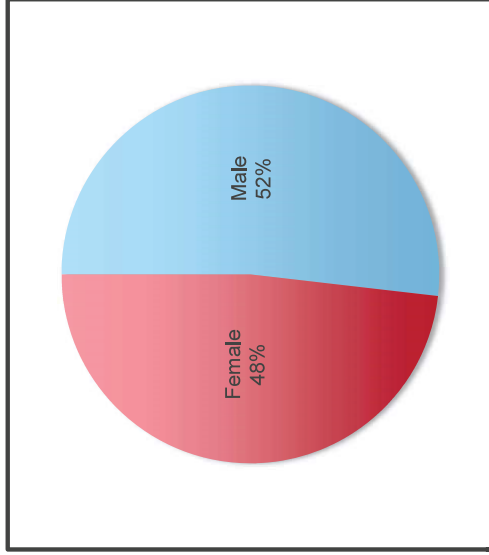

## Q75 What age group are you?



| Response      | Count | Percent |
|---------------|-------|---------|
| <18 years old | 16    | 3.6%    |
| 18-25         | 8     | 1.8%    |
| 26-34         | 18    | 4.1%    |
| 35-44         | 61    | 13.8%   |
| 45-54         | 89    | 20.2%   |
| 55-64         | 143   | 32.4%   |
| 65-74         | 83    | 18.8%   |
| 75+ years old | 23    | 5.2%    |
| Total         | 441   |         |

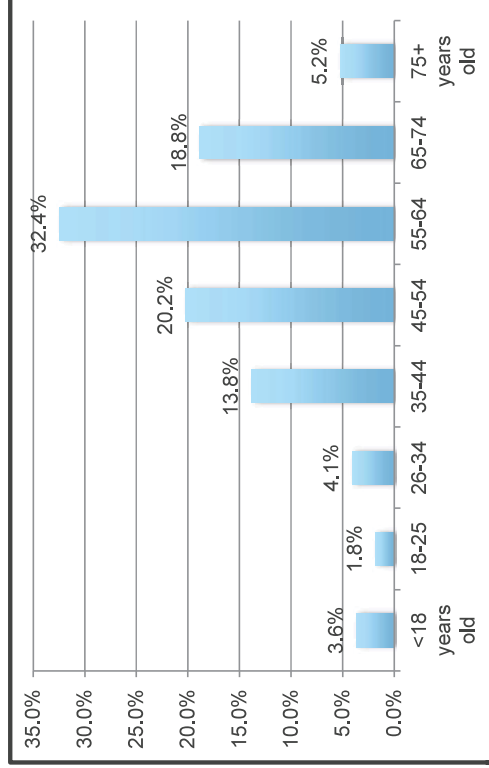

## Q76 What is your ethnicity?

| Response         | Count | Percent |
|------------------|-------|---------|
| Caucasian        | 411   | 92.6%   |
| Hispanic         | 8     | 1.8%    |
| African American | 6     | 1.4%    |
| Native American  | 5     | 1.1%    |
| Asian            | 8     | 1.8%    |
| Other            | 6     | 1.4%    |
| Total            | 444   |         |

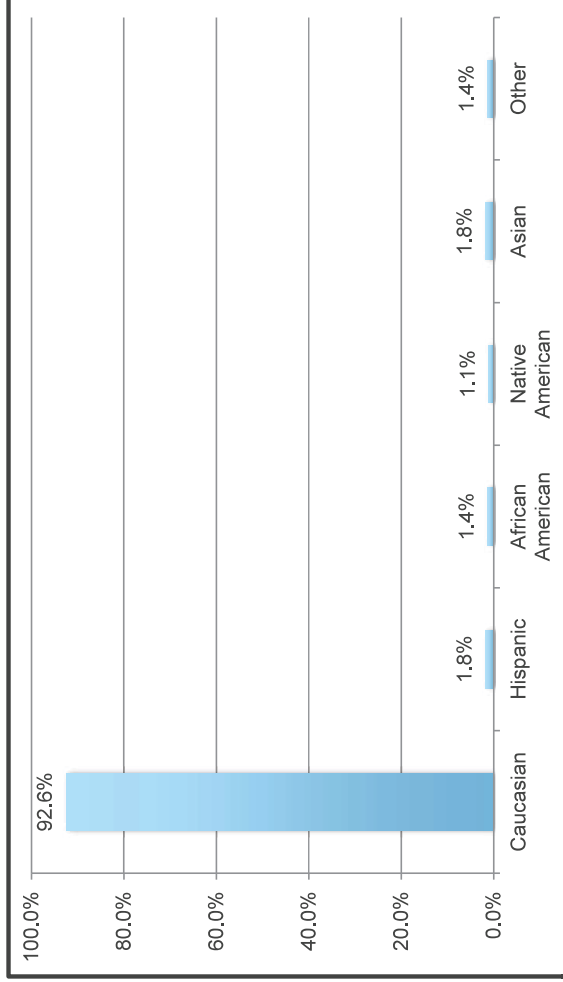

## Q77 How many children do you have?



| Response  | Count | Percent |
|-----------|-------|---------|
| None      | 104   | 23.7%   |
| 1         | 63    | 14.4%   |
| 2         | 167   | 38.0%   |
| 3         | 73    | 16.6%   |
| 4         | 18    | 4.1%    |
| 5         | 8     | 1.8%    |
| 6 or more | 6     | 1.4%    |
| Total     | 439   |         |



## Q78 Are you covered by health insurance?

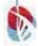

| Response                                                                    | Count | Percent |
|-----------------------------------------------------------------------------|-------|---------|
| Yes                                                                         | 421   | 95.5%   |
| No                                                                          | 5     | 1.1%    |
| I live outside the USA - and am covered by a governmental insurance program | 15    | 3.4%    |
| Total                                                                       | 441   |         |

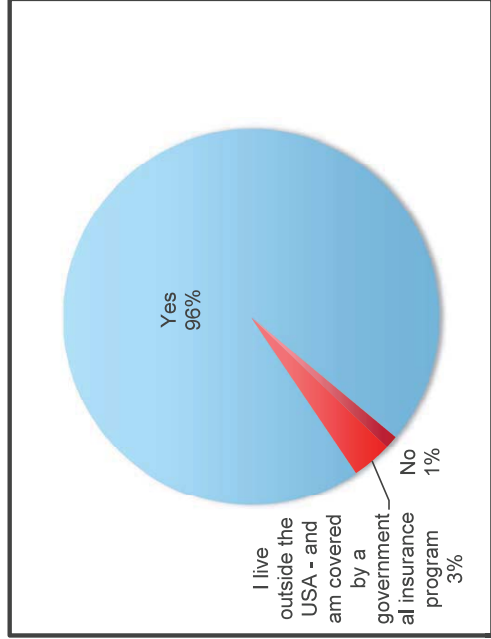

## Q79 If yes-- is the coverage?



| Response                                                         | Count | Percent |
|------------------------------------------------------------------|-------|---------|
| Provided by your or your spouse's employer                       | 208   | 49.2%   |
| Private insurance (you pay the entire premium)                   | 58    | 13.7%   |
| State Program                                                    | 12    | 2.8%    |
| Medicare                                                         | 18    | 4.3%    |
| Medicare and supplement                                          | 92    | 21.7%   |
| I have 2 forms of insurance (both my spouse and I have coverage) | 12    | 2.8%    |
| Other                                                            | 23    | 5.4%    |
| Total                                                            | 423   |         |

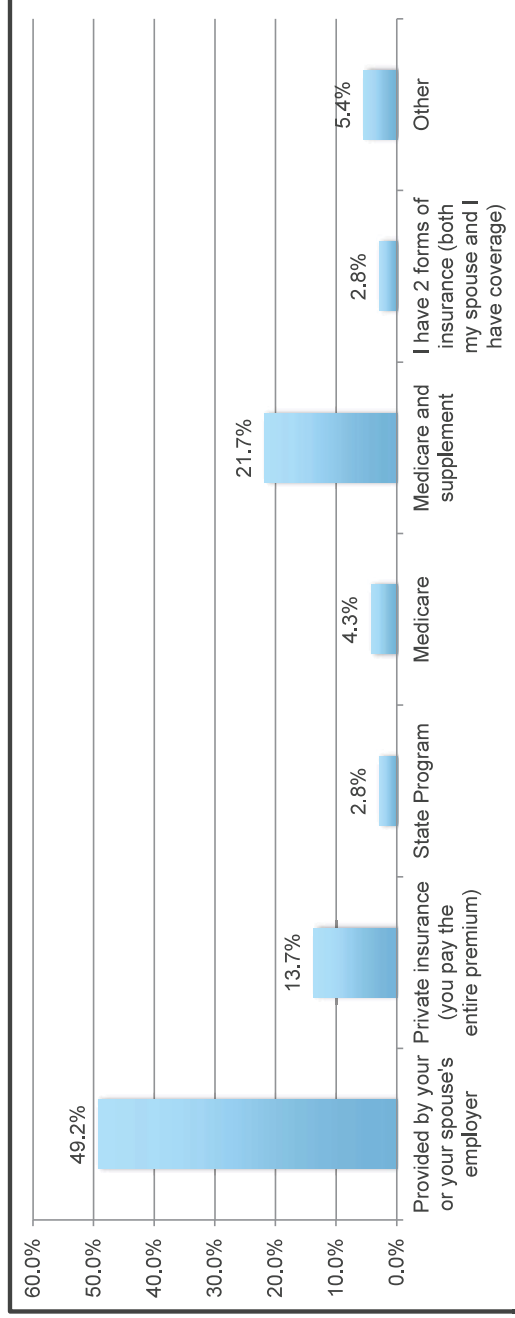

**Q80 Thank you for your participation in this survey. Are you interested in any of the following? (Check all that apply)**



| Response                                                 | Count | Percent |
|----------------------------------------------------------|-------|---------|
| Further sharing your experiences of being an HCM patient | 265   | 59.7%   |
| Learning more about participating in clinical trials     | 210   | 47.3%   |
| Total (N): all respondents                               | 444   |         |

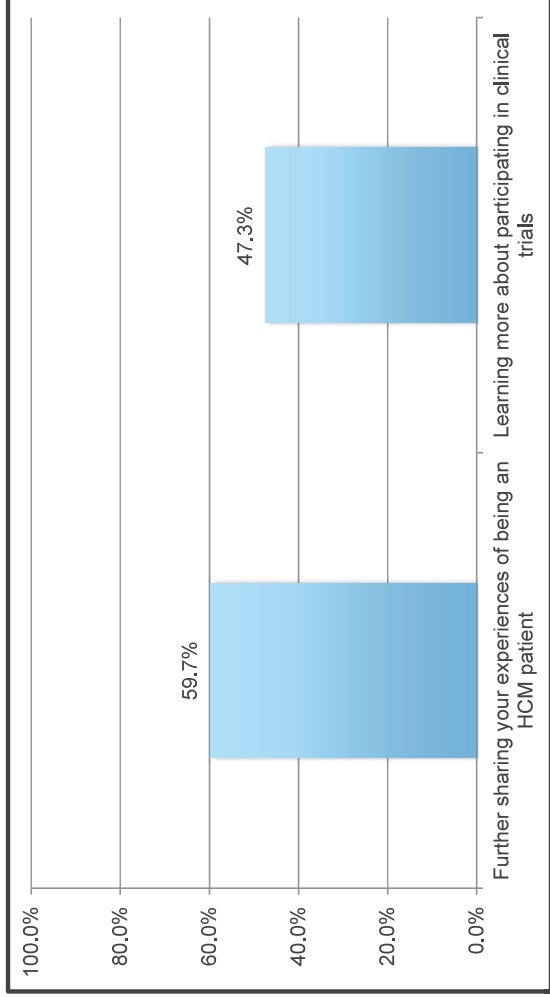

Supplement: 41687_2020_269_MOESM1_ESM.pdf [file 41687_2020_269_MOESM1_ESM.pdf]
